# Supplementary material for: Trehalose-6-Phosphate-Mediated Toxicity Determines Essentiality of OtsB2 in Mycobacterium tuberculosis In Vitro and in Mice
Source: PLoS Pathog. 2016 Dec 9;12(12):e1006043. doi: 10.1371/journal.ppat.1006043 (PMC5148154; doi:10.1371/journal.ppat.1006043)
Supplement: S1 Dataset — (XLSX) [file ppat.1006043.s016.xlsx]

## Sheet: p(corr)<0.01_FC>2
RvID	Description	Size	Fold Change partially silenced / induced cells	t-test: FDR-corrected p-value	Mean RPKM partially silenced Mtb c-otsB2-tet-on mutant	Mean RPKM induced Mtb c-otsB2-tet-on mutant
Rv1258c	[locus_tag=Rv1258c] [location=complement(1406081..1407340)]	1260	27.122	0.002419	1154.53	42.568
Rv0662c	[gene=vapB7] [locus_tag=Rv0662c] [location=complement(755769..756023)]	255	23.2941	0.002117	40.392	1.734
Rv1257c	[locus_tag=Rv1257c] [location=complement(1404717..1406084)]	1368	19.224	0.003704	2055.28	106.912
Rv1655	[gene=argD] [locus_tag=Rv1655] [location=1868723..1869925]	1203	15.9931	0.003259	841.221	52.599
Rv2164c	[locus_tag=Rv2164c] [location=complement(2427084..2428238)]	1155	15.9244	0.004448	605.668	38.034
Rv1652	[gene=argC] [locus_tag=Rv1652] [location=1865576..1866634]	1059	15.7243	0.00229	1133.34	72.076
Rv2165c	[locus_tag=Rv2165c] [location=complement(2428235..2429425)]	1191	15.542	0.009939	662.509	42.627
Rv1654	[gene=argB] [locus_tag=Rv1654] [location=1867842..1868726]	885	14.482	0.003245	1822.58	125.851
Rv1656	[gene=argF] [locus_tag=Rv1656] [location=1869922..1870845]	924	13.3808	0.001628	915.275	68.402
Rv1987	[locus_tag=Rv1987] [location=2231026..2231454]	429	12.4596	0.002409	454.826	36.504
Rv1657	[gene=argR] [locus_tag=Rv1657] [location=1870842..1871354]	513	12.3185	0.002981	480.804	39.031
Rv1653	[gene=argJ] [locus_tag=Rv1653] [location=1866631..1867845]	1215	11.969	0.006194	1000.02	83.551
Rv2163c	[gene=pbpB] [locus_tag=Rv2163c] [location=complement(2425048..2427087)]	2040	11.3568	0.002339	666.292	58.669
Rv1158c	[locus_tag=Rv1158c] [location=complement(1284179..1284862)]	684	11.115	0.001683	197.892	17.804
Rv2269c	[locus_tag=Rv2269c] [location=complement(2544289..2544621)]	333	10.9122	0.001245	661.869	60.654
Rv2416c	[gene=eis] [locus_tag=Rv2416c] [location=complement(2714124..2715332)]	1209	10.7413	0.01	415.665	38.698
Rv3638	[locus_tag=Rv3638] [location=4076984..4077730]	747	10.3488	0.01	59.547	5.754
Rv2748c	[gene=ftsK] [locus_tag=Rv2748c] [location=complement(3059855..3062506)]	2652	10.2854	0.005513	1271.58	123.629
Rv1658	[gene=argG] [locus_tag=Rv1658] [location=1871363..1872559]	1197	9.49542	0.006115	593.967	62.553
Rv3863	[locus_tag=Rv3863] [location=4338849..4340027]	1179	9.44845	0.003022	343.007	36.303
Rv0849	[locus_tag=Rv0849] [location=946056..947315]	1260	9.29076	0.005399	61.607	6.631
Rv2077A	[locus_tag=Rv2077A] [location=complement(2334295..2334594)]	300	9.24641	0.008745	33.472	3.62
Rv3510c	[locus_tag=Rv3510c] [location=complement(3938421..3939257)]	837	9.24049	0.008954	158.687	17.173
Rv2086	[locus_tag=Rv2086] [location=2343311..2343916]	606	9.10497	0.001846	123.6	13.575
Rv3819	[locus_tag=Rv3819] [location=4283996..4284331]	336	8.78262	0.003022	176.759	20.126
Rv3448	[gene=eccD4] [locus_tag=Rv3448] [location=3868352..3869755]	1404	8.73151	0.002117	18.179	2.082
Rv0259c	[locus_tag=Rv0259c] [location=complement(310774..311517)]	744	8.64686	0.002117	72.452	8.379
Rv2725c	[gene=hflX] [locus_tag=Rv2725c] [location=complement(3037427..3038914)]	1488	8.57442	0.00492	1761.85	205.477
Rv2211c	[gene=gcvT] [locus_tag=Rv2211c] [location=complement(2476042..2477181)]	1140	8.38088	0.002154	226.552	27.032
Rv3145	[gene=nuoA] [locus_tag=Rv3145] [location=3511682..3512068]	387	8.34953	0.005532	208.112	24.925
Rv3396c	[gene=guaA] [locus_tag=Rv3396c] [location=complement(3812501..3814078)]	1578	8.26997	0.001245	522.141	63.137
Rv2871	[gene=vapB43] [locus_tag=Rv2871] [location=3183138..3183395]	258	8.15537	0.005222	279.925	34.324
Rv1659	[gene=argH] [locus_tag=Rv1659] [location=1872639..1874051]	1413	8.00349	0.001184	203.945	25.482
Rv1383	[gene=carA] [locus_tag=Rv1383] [location=1555971..1557101]	1131	7.7824	0.001245	210.654	27.068
Rv3717	[locus_tag=Rv3717] [location=4161048..4161773]	726	7.69129	0.004031	196.797	25.587
Rv3148	[gene=nuoD] [locus_tag=Rv3148] [location=3513338..3514660]	1323	7.63771	0.005383	246.996	32.339
Rv3587c	[locus_tag=Rv3587c] [location=complement(4028968..4029762)]	795	7.6249	0.003882	366.247	48.033
Rv2142A	[gene=parD2] [locus_tag=Rv2142A] [location=complement(2402507..2402722)]	216	7.6037	0.008309	1093.94	143.87
Rv2864c	[locus_tag=Rv2864c] [location=complement(3175454..3177265)]	1812	7.58157	0.008735	75.103	9.906
Rv2231c	[gene=cobC] [locus_tag=Rv2231c] [location=complement(2504605..2505699)]	1095	7.55862	0.003947	136.69	18.084
Rv2755c	[gene=hsdS.1] [locus_tag=Rv2755c] [location=complement(3068189..3068464)]	276	7.38896	0.01	30.509	4.129
Rv2089c	[gene=pepE] [locus_tag=Rv2089c] [location=complement(2346197..2347324)]	1128	7.30437	0.001184	81.955	11.22
Rv0928	[gene=pstS3] [locus_tag=Rv0928] [location=1034903..1036015]	1113	7.23716	0.004747	113.855	15.732
Rv3651	[locus_tag=Rv3651] [location=4091841..4092878]	1038	7.19977	0.004775	210.795	29.278
Rv1381	[gene=pyrC] [locus_tag=Rv1381] [location=1554188..1555480]	1293	7.1942	0.002104	198.416	27.58
Rv1286	[gene=cysN] [locus_tag=Rv1286] [location=1438907..1440751]	1845	7.14448	0.008337	184.399	25.81
Rv2330c	[gene=lppP] [locus_tag=Rv2330c] [location=complement(2603695..2604222)]	528	6.99417	0.006633	80.349	11.488
Rv0892	[locus_tag=Rv0892] [location=993853..995340]	1488	6.96456	0.003326	104.942	15.068
Rv3201c	[locus_tag=Rv3201c] [location=complement(3573731..3577036)]	3306	6.91538	0.00271	109.595	15.848
Rv2230c	[locus_tag=Rv2230c] [location=complement(2503469..2504608)]	1140	6.82551	0.004299	196.602	28.804
Rv0031	[locus_tag=Rv0031] [location=33582..33794]	213	6.77872	0.01	398.731	58.821
Rv2229c	[locus_tag=Rv2229c] [location=complement(2502735..2503472)]	738	6.69866	0.006888	94.853	14.16
Rv3152	[gene=nuoH] [locus_tag=Rv3152] [location=3519282..3520514]	1233	6.68115	0.00229	297.545	44.535
Rv1601	[gene=hisB] [locus_tag=Rv1601] [location=1802035..1802667]	633	6.60716	0.006227	785.466	118.881
Rv3147	[gene=nuoC] [locus_tag=Rv3147] [location=3512628..3513338]	711	6.58608	0.00367	254.565	38.652
Rv2228c	[locus_tag=Rv2228c] [location=complement(2501644..2502738)]	1095	6.42287	0.006971	62.122	9.672
Rv3150	[gene=nuoF] [locus_tag=Rv3150] [location=3515412..3516749]	1338	6.37217	0.002409	242.748	38.095
Rv2501c	[gene=accA1] [locus_tag=Rv2501c] [location=complement(2814916..2816880)]	1965	6.37202	0.005148	230.355	36.151
Rv0848	[gene=cysK2] [locus_tag=Rv0848] [location=944938..946056]	1119	6.31777	0.008081	91.197	14.435
Rv2088	[gene=pknJ] [locus_tag=Rv2088] [location=2344411..2346180]	1770	6.29971	0.008424	75.061	11.915
Rv0783c	[gene=emrB] [locus_tag=Rv0783c] [location=complement(876818..878440)]	1623	6.26938	0.008081	202.689	32.33
Rv0554	[gene=bpoC] [locus_tag=Rv0554] [location=645467..646255]	789	6.23002	0.006888	79.682	12.79
Rv1726	[locus_tag=Rv1726] [location=1951852..1953237]	1386	6.22499	0.004705	45.735	7.347
Rv3146	[gene=nuoB] [locus_tag=Rv3146] [location=3512077..3512631]	555	6.2057	0.004969	217.64	35.071
Rv1946c	[gene=lppG] [locus_tag=Rv1946c] [location=complement(2197508..2197960)]	453	6.19831	0.005116	119.646	19.303
Rv1278	[locus_tag=Rv1278] [location=1427414..1430041]	2628	6.16865	0.004448	243.094	39.408
Rv1970	[gene=lprM] [locus_tag=Rv1970] [location=2214123..2215256]	1134	6.1655	0.003326	14.082	2.284
Rv3422c	[locus_tag=Rv3422c] [location=complement(3839691..3840197)]	507	6.15693	0.00229	232.775	37.807
Rv2448c	[gene=valS] [locus_tag=Rv2448c] [location=complement(2747595..2750225)]	2631	6.14217	0.004011	517.017	84.175
Rv2213	[gene=pepB] [locus_tag=Rv2213] [location=2478338..2479885]	1548	6.13591	0.001418	273.637	44.596
Rv3151	[gene=nuoG] [locus_tag=Rv3151] [location=3516746..3519166]	2421	6.13087	0.001418	518.022	84.494
Rv2614c	[gene=thrS] [locus_tag=Rv2614c] [location=complement(2941189..2943267)]	2079	6.12446	0.008337	240.03	39.192
Rv1384	[gene=carB] [locus_tag=Rv1384] [location=1557101..1560448]	3348	6.09161	0.003303	200.091	32.847
Rv1699	[gene=pyrG] [locus_tag=Rv1699] [location=1923829..1925589]	1761	6.06902	0.008081	693.798	114.318
Rv3536c	[gene=hsaE] [locus_tag=Rv3536c] [location=complement(3974511..3975296)]	786	6.02814	0.006822	151.873	25.194
Rv1951c	[locus_tag=Rv1951c] [location=complement(2200190..2200486)]	297	6.01558	0.006528	65.636	10.911
Rv0337c	[gene=aspC] [locus_tag=Rv0337c] [location=complement(401873..403162)]	1290	6.00564	0.007415	574.451	95.652
Rv3202c	[locus_tag=Rv3202c] [location=complement(3577033..3580200)]	3168	5.9966	0.004124	164.139	27.372
Rv0771	[locus_tag=Rv0771] [location=864140..864574]	435	5.966	0.008879	41.941	7.03
Rv1031	[gene=kdpC] [locus_tag=Rv1031] [location=1155853..1156422]	570	5.94309	0.002339	88.968	14.97
Rv1285	[gene=cysD] [locus_tag=Rv1285] [location=1437909..1438907]	999	5.92474	0.006888	165.632	27.956
Rv3080c	[gene=pknK] [locus_tag=Rv3080c] [location=complement(3442656..3445988)]	3333	5.89609	0.006971	120.292	20.402
Rv3149	[gene=nuoE] [locus_tag=Rv3149] [location=3514657..3515415]	759	5.89355	0.002117	332.343	56.391
Rv3200c	[locus_tag=Rv3200c] [location=complement(3572602..3573669)]	1068	5.87967	0.004775	226.085	38.452
Rv1622c	[gene=cydB] [locus_tag=Rv1622c] [location=complement(1823360..1824400)]	1041	5.86578	0.003484	1453.83	247.85
Rv1087A	[locus_tag=Rv1087A] [location=1214040..1214360]	321	5.77612	0.006227	111.433	19.292
Rv2153c	[gene=murG] [locus_tag=Rv2153c] [location=complement(2412119..2413351)]	1233	5.75338	0.006575	426.055	74.053
Rv2152c	[gene=murC] [locus_tag=Rv2152c] [location=complement(2410638..2412122)]	1485	5.71604	0.005086	512.397	89.642
Rv3011c	[gene=gatA] [locus_tag=Rv3011c] [location=complement(3369950..3371434)]	1485	5.70989	0.006933	83.176	14.567
Rv1380	[gene=pyrB] [locus_tag=Rv1380] [location=1553232..1554191]	960	5.69605	0.002409	154.716	27.162
Rv3534c	[gene=hsaF] [locus_tag=Rv3534c] [location=complement(3972552..3973592)]	1041	5.66293	0.007092	129.698	22.903
Rv3153	[gene=nuoI] [locus_tag=Rv3153] [location=3520507..3521142]	636	5.6604	0.007576	279.703	49.414
Rv2240c	[locus_tag=Rv2240c] [location=complement(2511690..2512280)]	591	5.65795	0.003561	188.127	33.25
Rv3564	[gene=fadE33] [locus_tag=Rv3564] [location=4005247..4006203]	957	5.64988	0.003426	54.979	9.731
Rv1030	[gene=kdpB] [locus_tag=Rv1030] [location=1153724..1155853]	2130	5.64318	0.001628	42.369	7.508
Rv1687c	[locus_tag=Rv1687c] [location=complement(1912153..1912920)]	768	5.63782	0.01	37.779	6.701
Rv3270	[gene=ctpC] [locus_tag=Rv3270] [location=3650526..3652682]	2157	5.62355	0.001913	3888.86	691.531
Rv2217	[gene=lipB] [locus_tag=Rv2217] [location=2484584..2485276]	693	5.60385	0.003094	922.926	164.695
Rv1691	[locus_tag=Rv1691] [location=1915949..1916701]	753	5.56957	0.002409	74.688	13.41
Rv3209	[locus_tag=Rv3209] [location=3586274..3586834]	561	5.55005	0.008489	303.532	54.69
Rv0778	[gene=cyp126] [locus_tag=Rv0778] [location=871431..872675]	1245	5.50376	0.009231	385.131	69.976
Rv3470c	[gene=ilvB2] [locus_tag=Rv3470c] [location=complement(3887144..3888802)]	1659	5.47517	0.006101	37.483	6.846
Rv1326c	[gene=glgB] [locus_tag=Rv1326c] [location=complement(1490117..1492312)]	2196	5.47092	0.002981	501.93	91.745
Rv2823c	[locus_tag=Rv2823c] [location=complement(3129344..3131773)]	2430	5.46648	0.008454	95.565	17.482
Rv3330	[gene=dacB1] [locus_tag=Rv3330] [location=3715777..3716994]	1218	5.45827	0.004368	84.232	15.432
Rv1495	[gene=mazF4] [locus_tag=Rv1495] [location=1686570..1686887]	318	5.45479	0.005518	199.52	36.577
Rv2876	[locus_tag=Rv2876] [location=3187663..3187977]	315	5.44521	0.002409	504.782	92.702
Rv2613c	[locus_tag=Rv2613c] [location=complement(2940609..2941196)]	588	5.43978	0.003175	251.704	46.271
Rv3628	[gene=ppa] [locus_tag=Rv3628] [location=4067423..4067911]	489	5.42766	0.004031	62.353	11.488
Rv1288	[locus_tag=Rv1288] [location=1441348..1442718]	1371	5.42126	0.001683	70.883	13.075
Rv0457c	[locus_tag=Rv0457c] [location=complement(547586..549607)]	2022	5.41633	0.00317	49.879	9.209
Rv2916c	[gene=ffh] [locus_tag=Rv2916c] [location=complement(3224708..3226285)]	1578	5.396	0.002612	207.962	38.54
Rv1277	[locus_tag=Rv1277] [location=1426164..1427417]	1254	5.39058	0.004525	296.444	54.993
Rv1602	[gene=hisH] [locus_tag=Rv1602] [location=1802664..1803284]	621	5.38585	0.005449	270.935	50.305
Rv1673c	[locus_tag=Rv1673c] [location=complement(1898300..1899232)]	933	5.37972	0.004705	22.229	4.132
Rv1864c	[locus_tag=Rv1864c] [location=complement(2111354..2112109)]	756	5.35093	0.01	34.262	6.403
Rv2700	[locus_tag=Rv2700] [location=3015203..3015853]	651	5.35083	0.006286	300.037	56.073
Rv1259	[gene=udgB] [locus_tag=Rv1259] [location=1407339..1408238]	900	5.34057	0.005414	42.073	7.878
Rv3012c	[gene=gatC] [locus_tag=Rv3012c] [location=complement(3371431..3371730)]	300	5.33737	0.009004	73.629	13.795
Rv1002c	[locus_tag=Rv1002c] [location=complement(1118428..1119939)]	1512	5.33092	0.004415	237.082	44.473
Rv2215	[gene=dlaT] [locus_tag=Rv2215] [location=2481965..2483626]	1662	5.3259	0.009799	512.144	96.161
Rv3421c	[locus_tag=Rv3421c] [location=complement(3839059..3839694)]	636	5.32192	0.008961	525.667	98.774
Rv3666c	[gene=dppA] [locus_tag=Rv3666c] [location=complement(4105459..4107084)]	1626	5.30812	0.009276	203.232	38.287
Rv2227	[locus_tag=Rv2227] [location=2500931..2501632]	702	5.3061	0.002494	67.101	12.646
Rv0784	[locus_tag=Rv0784] [location=878638..879324]	687	5.2798	0.004448	138.616	26.254
Rv0631c	[gene=recC] [locus_tag=Rv0631c] [location=complement(725013..728306)]	3294	5.23125	0.003326	27.553	5.267
Rv1700	[locus_tag=Rv1700] [location=1925582..1926205]	624	5.22585	0.005446	507.994	97.208
Rv2498c	[gene=citE] [locus_tag=Rv2498c] [location=complement(2812355..2813176)]	822	5.20902	0.002104	233.708	44.866
Rv3720	[locus_tag=Rv3720] [location=4163736..4164998]	1263	5.20815	0.003457	551.611	105.913
Rv0915c	[gene=PPE14] [locus_tag=Rv0915c] [location=complement(1020058..1021329)]	1272	5.2074	0.008961	44.742	8.592
Rv2611c	[locus_tag=Rv2611c] [location=complement(2939012..2939962)]	951	5.19748	0.007415	217.078	41.766
Rv1917c	[gene=PPE34] [locus_tag=Rv1917c] [location=complement(2162932..2167311)]	4380	5.18365	0.004775	11.601	2.238
Rv3719	[locus_tag=Rv3719] [location=4162306..4163718]	1413	5.18036	0.004166	524.713	101.289
Rv0630c	[gene=recB] [locus_tag=Rv0630c] [location=complement(721729..725013)]	3285	5.18022	0.001577	38.401	7.413
Rv2280	[locus_tag=Rv2280] [location=2551560..2552939]	1380	5.1665	0.003175	361.159	69.904
Rv3563	[gene=fadE32] [locus_tag=Rv3563] [location=4004291..4005250]	960	5.16267	0.002385	38.276	7.414
Rv3043c	[gene=ctaD] [locus_tag=Rv3043c] [location=complement(3403200..3404921)]	1722	5.16206	0.009323	457.849	88.695
Rv2843	[locus_tag=Rv2843] [location=3150171..3150716]	546	5.08417	0.002117	83.36	16.396
Rv0461	[locus_tag=Rv0461] [location=552026..552550]	525	5.05134	0.004011	254.648	50.412
Rv1909c	[gene=furA] [locus_tag=Rv1909c] [location=complement(2156149..2156592)]	444	5.05051	0.008081	1425.42	282.233
Rv0437c	[gene=psd] [locus_tag=Rv0437c] [location=complement(525387..526082)]	696	5.03352	0.004084	157.539	31.298
Rv0386	[locus_tag=Rv0386] [location=463411..466668]	3258	5.02918	0.008148	62.211	12.37
Rv1287	[locus_tag=Rv1287] [location=1440805..1441290]	486	5.01912	0.008273	123.37	24.58
Rv0958	[locus_tag=Rv0958] [location=1069883..1071262]	1380	5.01839	0.005532	290.655	57.918
Rv2886c	[locus_tag=Rv2886c] [location=complement(3195545..3196432)]	888	4.99769	0.009767	101.748	20.359
Rv0130	[gene=htdZ] [locus_tag=Rv0130] [location=157847..158302]	456	4.98664	0.003326	33.595	6.737
Rv1525	[gene=wbbL2] [locus_tag=Rv1525] [location=1720017..1720802]	786	4.94371	0.008583	103.101	20.855
Rv2689c	[locus_tag=Rv2689c] [location=complement(3005845..3007062)]	1218	4.93656	0.003326	26.845	5.438
Rv2525c	[locus_tag=Rv2525c] [location=complement(2849852..2850574)]	723	4.93367	0.00763	134.862	27.335
Rv3350c	[gene=PPE56] [locus_tag=Rv3350c] [location=complement(3755952..3767102)]	11151	4.92608	0.004683	29.99	6.088
Rv2180c	[locus_tag=Rv2180c] [location=complement(2442327..2443214)]	888	4.92579	0.008539	85.364	17.33
Rv2446c	[locus_tag=Rv2446c] [location=complement(2745767..2746138)]	372	4.91222	0.002104	258.604	52.645
Rv0161	[locus_tag=Rv0161] [location=190607..191956]	1350	4.91075	0.005243	29.548	6.017
Rv2659c	[locus_tag=Rv2659c] [location=complement(2979691..2980818)]	1128	4.8767	0.003326	119.64	24.533
Rv3776	[locus_tag=Rv3776] [location=4221089..4222648]	1560	4.8766	0.007415	267.306	54.814
Rv3509c	[gene=ilvX] [locus_tag=Rv3509c] [location=complement(3936877..3938424)]	1548	4.8657	0.001184	105.97	21.779
Rv3082c	[gene=virS] [locus_tag=Rv3082c] [location=complement(3447404..3448426)]	1023	4.86464	0.007053	30.691	6.309
Rv1771	[locus_tag=Rv1771] [location=2005161..2006447]	1287	4.85884	0.008887	158.544	32.63
Rv0077c	[locus_tag=Rv0077c] [location=complement(85636..86466)]	831	4.84588	0.007592	87.88	18.135
Rv0410c	[gene=pknG] [locus_tag=Rv0410c] [location=complement(495062..497314)]	2253	4.84304	0.01	543.757	112.276
Rv0780	[gene=purC] [locus_tag=Rv0780] [location=873343..874236]	894	4.82184	0.004788	105.902	21.963
Rv0552	[locus_tag=Rv0552] [location=642889..644493]	1605	4.8198	0.006832	107.713	22.348
Rv3436c	[gene=glmS] [locus_tag=Rv3436c] [location=complement(3855015..3856889)]	1875	4.81887	0.005668	276.121	57.3
Rv1280c	[gene=oppA] [locus_tag=Rv1280c] [location=complement(1431665..1433440)]	1776	4.81719	0.004084	126.933	26.35
Rv2447c	[gene=folC] [locus_tag=Rv2447c] [location=complement(2746135..2747598)]	1464	4.80937	0.001184	554.184	115.23
Rv3471c	[locus_tag=Rv3471c] [location=complement(3888808..3889341)]	534	4.74273	0.00972	11.577	2.441
Rv0094c	[locus_tag=Rv0094c] [location=complement(103710..104663)]	954	4.74014	0.007368	25.72	5.426
Rv0785	[locus_tag=Rv0785] [location=879340..881040]	1701	4.73398	0.002861	53.92	11.39
Rv0613c	[locus_tag=Rv0613c] [location=complement(706948..709515)]	2568	4.73382	0.00392	258.812	54.673
Rv2922c	[gene=smc] [locus_tag=Rv2922c] [location=complement(3234189..3237806)]	3618	4.72969	0.006084	106.787	22.578
Rv3079c	[locus_tag=Rv3079c] [location=complement(3441770..3442597)]	828	4.72168	0.006971	33.302	7.053
Rv1281c	[gene=oppD] [locus_tag=Rv1281c] [location=complement(1433433..1435271)]	1839	4.70741	0.009001	100.715	21.395
Rv0376c	[locus_tag=Rv0376c] [location=complement(453230..454372)]	1143	4.7062	0.005518	37.099	7.883
Rv2097c	[gene=pafA] [locus_tag=Rv2097c] [location=complement(2355319..2356677)]	1359	4.70512	0.004525	599.131	127.336
Rv3447c	[gene=eccC4] [locus_tag=Rv3447c] [location=complement(3864528..3868238)]	3711	4.69745	0.008574	10.48	2.231
Rv2655c	[locus_tag=Rv2655c] [location=complement(2977231..2978658)]	1428	4.69673	0.01	194.872	41.491
Rv2610c	[gene=pimA] [locus_tag=Rv2610c] [location=complement(2937865..2939001)]	1137	4.69321	0.001209	148.972	31.742
Rv1428c	[locus_tag=Rv1428c] [location=complement(1603932..1604759)]	828	4.68883	0.006054	69.587	14.841
Rv3423c	[gene=alr] [locus_tag=Rv3423c] [location=complement(3840194..3841420)]	1227	4.67981	0.003426	378.021	80.777
Rv2505c	[gene=fadD35] [locus_tag=Rv2505c] [location=complement(2819953..2821596)]	1644	4.66801	0.00229	32.424	6.946
Rv0407	[gene=fgd1] [locus_tag=Rv0407] [location=490783..491793]	1011	4.64959	0.005625	148.452	31.928
Rv3760	[locus_tag=Rv3760] [location=4205538..4205840]	303	4.6463	0.007584	38.318	8.247
Rv1251c	[locus_tag=Rv1251c] [location=complement(1395821..1399240)]	3420	4.63231	0.001577	40.63	8.771
Rv1354c	[locus_tag=Rv1354c] [location=complement(1520005..1521876)]	1872	4.63139	0.002804	78.414	16.931
Rv3267	[locus_tag=Rv3267] [location=3647885..3649381]	1497	4.61935	0.003546	696.363	150.749
Rv0412c	[locus_tag=Rv0412c] [location=complement(498300..499619)]	1320	4.61284	0.009134	815.757	176.845
Rv3370c	[gene=dnaE2] [locus_tag=Rv3370c] [location=complement(3781501..3784740)]	3240	4.60506	0.003326	214.034	46.478
Rv2455c	[locus_tag=Rv2455c] [location=complement(2754743..2756704)]	1962	4.59956	0.00756	1395.79	303.461
Rv1891	[locus_tag=Rv1891] [location=2139741..2140148]	408	4.59768	0.003484	366.973	79.817
Rv1260	[locus_tag=Rv1260] [location=1408240..1409358]	1119	4.59405	0.005386	122.289	26.619
Rv1629	[gene=polA] [locus_tag=Rv1629] [location=1830665..1833379]	2715	4.57053	0.008337	312.606	68.396
Rv0425c	[gene=ctpH] [locus_tag=Rv0425c] [location=complement(510702..515321)]	4620	4.56317	0.002419	625.793	137.14
Rv2069	[gene=sigC] [locus_tag=Rv2069] [location=2326944..2327501]	558	4.55932	0.003982	222.358	48.77
Rv0845	[locus_tag=Rv0845] [location=941190..942467]	1278	4.55808	0.006227	40.968	8.988
Rv1406	[gene=fmt] [locus_tag=Rv1406] [location=1582166..1583104]	939	4.55358	0.006888	391.799	86.042
Rv1683	[locus_tag=Rv1683] [location=1907594..1910593]	3000	4.55276	0.002409	694.023	152.44
Rv3199c	[gene=nudC] [locus_tag=Rv3199c] [location=complement(3571602..3572543)]	942	4.54232	0.003882	136.247	29.995
Rv2863	[gene=vapC23] [locus_tag=Rv2863] [location=3174992..3175372]	381	4.53327	0.00366	14.239	3.141
Rv3154	[gene=nuoJ] [locus_tag=Rv3154] [location=3521139..3521927]	789	4.52119	0.004788	258.567	57.19
Rv1599	[gene=hisD] [locus_tag=Rv1599] [location=1799583..1800899]	1317	4.51246	0.005189	1777.67	393.947
Rv2507	[locus_tag=Rv2507] [location=2822438..2823259]	822	4.50863	0.003531	340.947	75.621
Rv3625c	[gene=mesJ] [locus_tag=Rv3625c] [location=complement(4063901..4064872)]	972	4.50285	0.008029	106.803	23.719
Rv3631	[locus_tag=Rv3631] [location=4070514..4071239]	726	4.48611	0.006797	44.565	9.934
Rv1253	[gene=deaD] [locus_tag=Rv1253] [location=1399970..1401661]	1692	4.48374	0.009999	226.689	50.558
Rv3271c	[locus_tag=Rv3271c] [location=complement(3652679..3653347)]	669	4.47991	0.001245	1056.12	235.746
Rv3626c	[locus_tag=Rv3626c] [location=complement(4064851..4065903)]	1053	4.47632	0.007415	541.487	120.967
Rv2915c	[locus_tag=Rv2915c] [location=complement(3223568..3224680)]	1113	4.46939	0.004448	87.028	19.472
Rv2764c	[gene=thyA] [locus_tag=Rv2764c] [location=complement(3073680..3074471)]	792	4.46702	0.00392	800.579	179.22
Rv2993c	[locus_tag=Rv2993c] [location=complement(3350274..3350993)]	720	4.46279	0.006645	205.382	46.021
Rv0883c	[locus_tag=Rv0883c] [location=complement(980506..981267)]	762	4.44479	0.004007	138.424	31.143
Rv2219	[locus_tag=Rv2219] [location=2486235..2486987]	753	4.44192	0.006888	331.798	74.697
Rv0441c	[locus_tag=Rv0441c] [location=complement(530296..530724)]	429	4.41593	0.005128	573.324	129.831
Rv2490c	[gene=PE_PGRS43] [locus_tag=Rv2490c] [location=complement(2801254..2806236)]	4983	4.41385	0.003747	5.226	1.184
Rv1621c	[gene=cydD] [locus_tag=Rv1621c] [location=complement(1821690..1823273)]	1584	4.41158	0.003326	599.736	135.946
Rv1027c	[gene=kdpE] [locus_tag=Rv1027c] [location=complement(1148427..1149107)]	681	4.40903	0.01	66.325	15.043
Rv0945	[locus_tag=Rv0945] [location=1054247..1055008]	762	4.39913	0.004084	137.882	31.343
Rv2485c	[gene=lipQ] [locus_tag=Rv2485c] [location=complement(2792723..2793988)]	1266	4.39011	0.00271	31.6	7.198
Rv1912c	[gene=fadB5] [locus_tag=Rv1912c] [location=complement(2158087..2159091)]	1005	4.38912	0.005116	48.074	10.953
Rv0621	[locus_tag=Rv0621] [location=714202..715266]	1065	4.38749	0.01	121.45	27.681
Rv3606c	[gene=folK] [locus_tag=Rv3606c] [location=complement(4048181..4048747)]	567	4.35327	0.005501	520.473	119.559
Rv1974	[locus_tag=Rv1974] [location=2217659..2218036]	378	4.34643	0.005795	30.199	6.948
Rv0209	[locus_tag=Rv0209] [location=249038..250123]	1086	4.3455	0.001577	99.916	22.993
Rv2267c	[locus_tag=Rv2267c] [location=complement(2541644..2542810)]	1167	4.34128	0.008951	8.739	2.013
Rv3303c	[gene=lpdA] [locus_tag=Rv3303c] [location=complement(3689457..3690938)]	1482	4.33544	0.001418	109.587	25.277
Rv2042c	[locus_tag=Rv2042c] [location=complement(2287884..2288681)]	798	4.3264	0.006822	183.331	42.375
Rv0429c	[gene=def] [locus_tag=Rv0429c] [location=complement(517803..518396)]	594	4.3141	0.004626	80.514	18.663
Rv0853c	[gene=pdc] [locus_tag=Rv0853c] [location=complement(949436..951118)]	1683	4.31253	0.005821	85.069	19.726
Rv2467	[gene=pepN] [locus_tag=Rv2467] [location=2768986..2771571]	2586	4.30723	0.003975	142.354	33.05
Rv3500c	[gene=yrbE4B] [locus_tag=Rv3500c] [location=complement(3919220..3920062)]	843	4.30494	0.006721	50.385	11.704
Rv2577	[locus_tag=Rv2577] [location=2900918..2902507]	1590	4.29387	0.007518	30.465	7.095
Rv0781	[gene=ptrBa] [locus_tag=Rv0781] [location=874233..874943]	711	4.28769	0.00882	142.647	33.269
Rv1379	[gene=pyrR] [locus_tag=Rv1379] [location=1552654..1553235]	582	4.28647	0.009134	232.078	54.142
Rv2983	[locus_tag=Rv2983] [location=3339118..3339762]	645	4.28024	0.005483	30.608	7.151
Rv0372c	[locus_tag=Rv0372c] [location=complement(448630..449385)]	756	4.27966	0.006781	11.217	2.621
Rv3314c	[gene=deoA] [locus_tag=Rv3314c] [location=complement(3702184..3703467)]	1284	4.27358	0.004007	65.279	15.275
Rv3538	[locus_tag=Rv3538] [location=3977062..3977922]	861	4.26927	0.002104	99.111	23.215
Rv2154c	[gene=ftsW] [locus_tag=Rv2154c] [location=complement(2413348..2414922)]	1575	4.26785	0.006749	561.568	131.581
Rv3275c	[gene=purE] [locus_tag=Rv3275c] [location=complement(3658114..3658638)]	525	4.26083	0.008957	50.87	11.939
Rv0633c	[locus_tag=Rv0633c] [location=complement(729327..730166)]	840	4.25715	0.006449	95.143	22.349
Rv2162c	[gene=PE_PGRS38] [locus_tag=Rv2162c] [location=complement(2423240..2424838)]	1599	4.25569	0.006407	399.826	93.951
Rv3205c	[locus_tag=Rv3205c] [location=complement(3581627..3582505)]	879	4.25476	0.007404	530.624	124.713
Rv3198A	[locus_tag=Rv3198A] [location=3571335..3571589]	255	4.247	0.008329	55.504	13.069
Rv1084	[locus_tag=Rv1084] [location=1207636..1209657]	2022	4.24162	0.009134	163.421	38.528
Rv3537	[gene=kstD] [locus_tag=Rv3537] [location=3975369..3977060]	1692	4.22118	0.004775	174.719	41.391
Rv1702c	[locus_tag=Rv1702c] [location=complement(1927211..1928575)]	1365	4.21161	0.002339	53.378	12.674
Rv3908	[gene=mutT4] [locus_tag=Rv3908] [location=4393449..4394195]	747	4.20953	0.006084	224.633	53.363
Rv1120c	[locus_tag=Rv1120c] [location=complement(1243010..1243504)]	495	4.20752	0.009836	24.269	5.768
Rv1020	[gene=mfd] [locus_tag=Rv1020] [location=1138967..1142671]	3705	4.18868	0.002774	216.957	51.796
Rv3608c	[gene=folP1] [locus_tag=Rv3608c] [location=complement(4049138..4049980)]	843	4.18708	0.008242	295.022	70.46
Rv0445c	[gene=sigK] [locus_tag=Rv0445c] [location=complement(533833..534396)]	564	4.18657	0.002385	164.524	39.298
Rv1945	[locus_tag=Rv1945] [location=2195989..2197353]	1365	4.18498	0.008781	138.682	33.138
Rv2978c	[locus_tag=Rv2978c] [location=complement(3333785..3335164)]	1380	4.17772	0.005274	689.708	165.092
Rv2476c	[gene=gdh] [locus_tag=Rv2476c] [location=complement(2777388..2782262)]	4875	4.17243	0.002117	405.998	97.305
Rv3167c	[locus_tag=Rv3167c] [location=complement(3535431..3536057)]	627	4.15478	0.004149	16.428	3.954
Rv0752c	[gene=fadE9] [locus_tag=Rv0752c] [location=complement(843242..844414)]	1173	4.14528	0.006774	174.902	42.193
Rv3388	[gene=PE_PGRS52] [locus_tag=Rv3388] [location=3801653..3803848]	2196	4.14005	0.005	7.597	1.835
Rv3157	[gene=nuoM] [locus_tag=Rv3157] [location=3524132..3525793]	1662	4.1373	0.002104	356.958	86.278
Rv1617	[gene=pykA] [locus_tag=Rv1617] [location=1816189..1817607]	1419	4.13693	0.002816	422.558	102.143
Rv3768	[locus_tag=Rv3768] [location=4214070..4214429]	360	4.12473	0.007691	17.493	4.241
Rv0408	[gene=pta] [locus_tag=Rv0408] [location=491786..493858]	2073	4.1181	0.006009	120.681	29.305
Rv3497c	[gene=mce4C] [locus_tag=Rv3497c] [location=complement(3915883..3916956)]	1074	4.11294	0.007108	151.784	36.904
Rv2351c	[gene=plcA] [locus_tag=Rv2351c] [location=complement(2630537..2632075)]	1539	4.11028	0.0074	41.596	10.12
Rv3525c	[locus_tag=Rv3525c] [location=complement(3961800..3962324)]	525	4.10955	0.007415	26.371	6.417
Rv0998	[locus_tag=Rv0998] [location=1114748..1115749]	1002	4.10803	0.004489	384.302	93.549
Rv0041	[gene=leuS] [locus_tag=Rv0041] [location=43562..46471]	2910	4.10513	0.006113	281.645	68.608
Rv1367c	[locus_tag=Rv1367c] [location=complement(1539512..1540645)]	1134	4.09371	0.006888	79.59	19.442
Rv1028c	[gene=kdpD] [locus_tag=Rv1028c] [location=complement(1149104..1151686)]	2583	4.08835	0.00317	137.81	33.708
Rv0387c	[locus_tag=Rv0387c] [location=complement(466672..467406)]	735	4.08648	0.004101	32.982	8.071
Rv3761c	[gene=fadE36] [locus_tag=Rv3761c] [location=complement(4205862..4206917)]	1056	4.08084	0.008577	77.997	19.113
Rv1328	[gene=glgP] [locus_tag=Rv1328] [location=1494564..1497155]	2592	4.07399	0.001245	283.33	69.546
Rv1837c	[gene=glcB] [locus_tag=Rv1837c] [location=complement(2084756..2086981)]	2226	4.06771	0.00903	949.797	233.497
Rv1127c	[gene=ppdK] [locus_tag=Rv1127c] [location=complement(1249932..1251404)]	1473	4.06504	0.002339	322.183	79.257
Rv2883c	[gene=pyrH] [locus_tag=Rv2883c] [location=complement(3192373..3193158)]	786	4.06203	0.002104	500.576	123.233
Rv3034c	[locus_tag=Rv3034c] [location=complement(3394019..3394921)]	903	4.05734	0.01	103.162	25.426
Rv1098c	[gene=fum] [locus_tag=Rv1098c] [location=complement(1226141..1227565)]	1425	4.04774	0.004829	164.415	40.619
Rv3296	[gene=lhr] [locus_tag=Rv3296] [location=3676775..3681316]	4542	4.04611	0.005243	200.517	49.558
Rv0339c	[locus_tag=Rv0339c] [location=complement(405950..408448)]	2499	4.04294	0.00233	103.766	25.666
Rv2733c	[locus_tag=Rv2733c] [location=complement(3044986..3046524)]	1539	4.04208	0.001184	276.284	68.352
Rv1421	[locus_tag=Rv1421] [location=1595979..1596884]	906	4.03761	0.00463	435.573	107.879
Rv2318	[gene=uspC] [locus_tag=Rv2318] [location=2590518..2591840]	1323	4.03759	0.0075	35.765	8.858
Rv0062	[gene=celA1] [locus_tag=Rv0062] [location=65552..66694]	1143	4.03016	0.006888	99.283	24.635
Rv0261c	[gene=narK3] [locus_tag=Rv0261c] [location=complement(312759..314168)]	1410	4.01709	0.002409	21.628	5.384
Rv1126c	[locus_tag=Rv1126c] [location=complement(1249330..1249935)]	606	4.01672	0.006084	201.362	50.131
Rv3723	[locus_tag=Rv3723] [location=4168536..4169300]	765	4.00303	0.006822	245.758	61.393
Rv3712	[locus_tag=Rv3712] [location=4156981..4158222]	1242	4.00211	0.003326	62.489	15.614
Rv0439c	[locus_tag=Rv0439c] [location=complement(527379..528314)]	936	3.99968	0.008954	111.639	27.912
Rv2469c	[locus_tag=Rv2469c] [location=complement(2772367..2773035)]	669	3.99933	0.004058	167.728	41.939
Rv3630	[locus_tag=Rv3630] [location=4069175..4070470]	1296	3.99914	0.006261	64.834	16.212
Rv1867	[locus_tag=Rv1867] [location=2115764..2117248]	1485	3.99667	0.01	63.695	15.937
Rv3561	[gene=fadD3] [locus_tag=Rv3561] [location=4001637..4003160]	1524	3.99045	0.002104	42.195	10.574
Rv2795c	[locus_tag=Rv2795c] [location=complement(3103937..3104911)]	975	3.98176	0.002409	540.078	135.638
Rv3529c	[locus_tag=Rv3529c] [location=complement(3965884..3967038)]	1155	3.98118	0.008756	63.902	16.051
Rv2270	[gene=lppN] [locus_tag=Rv2270] [location=2544698..2545225]	528	3.98111	0.008951	30.973	7.78
Rv2415c	[locus_tag=Rv2415c] [location=complement(2712891..2713784)]	894	3.97675	0.002117	49.594	12.471
Rv0973c	[gene=accA2] [locus_tag=Rv0973c] [location=complement(1083747..1085750)]	2004	3.97626	0.002104	83.585	21.021
Rv0186	[gene=bglS] [locus_tag=Rv0186] [location=216269..218344]	2076	3.96545	0.005532	500.82	126.296
Rv0553	[gene=menC] [locus_tag=Rv0553] [location=644490..645470]	981	3.96462	0.003022	47.294	11.929
Rv2181	[locus_tag=Rv2181] [location=2443302..2444585]	1284	3.96441	0.004274	393.864	99.35
Rv1695	[gene=ppnK] [locus_tag=Rv1695] [location=1918746..1919669]	924	3.96171	0.006084	148.37	37.451
Rv0800	[gene=pepC] [locus_tag=Rv0800] [location=893318..894619]	1302	3.95753	0.006888	47.249	11.939
Rv3463	[locus_tag=Rv3463] [location=3880907..3881764]	858	3.95595	0.001834	38.076	9.625
Rv3622c	[gene=PE32] [locus_tag=Rv3622c] [location=complement(4061899..4062198)]	300	3.95446	0.01	12.33	3.118
Rv1858	[gene=modB] [locus_tag=Rv1858] [location=2105773..2106567]	795	3.95385	0.00526	115.397	29.186
Rv1099c	[gene=glpX] [locus_tag=Rv1099c] [location=complement(1227596..1228684)]	1089	3.95001	0.008999	134.245	33.986
Rv0751c	[gene=mmsB] [locus_tag=Rv0751c] [location=complement(842347..843231)]	885	3.94455	0.002409	190.581	48.315
Rv2191	[locus_tag=Rv2191] [location=2453819..2455756]	1938	3.94059	0.005148	99.429	25.232
Rv3068c	[gene=pgmA] [locus_tag=Rv3068c] [location=complement(3431979..3433622)]	1644	3.94035	0.004031	73.791	18.727
Rv3042c	[gene=serB2] [locus_tag=Rv3042c] [location=complement(3401933..3403162)]	1230	3.93481	0.006527	398.691	101.324
Rv3694c	[locus_tag=Rv3694c] [location=complement(4136122..4137114)]	993	3.93208	0.007185	250.088	63.602
Rv3627c	[locus_tag=Rv3627c] [location=complement(4065900..4067285)]	1386	3.92371	0.00229	489.028	124.634
Rv0959	[locus_tag=Rv0959] [location=1071255..1073273]	2019	3.91535	0.01	202.541	51.73
Rv1263	[gene=amiB2] [locus_tag=Rv1263] [location=1410431..1411819]	1389	3.90989	0.003259	42.524	10.876
Rv1604	[gene=impA] [locus_tag=Rv1604] [location=1804039..1804851]	813	3.90909	0.003361	497.983	127.391
Rv1032c	[gene=trcS] [locus_tag=Rv1032c] [location=complement(1156426..1157955)]	1530	3.90882	0.004565	49.642	12.7
Rv1770	[locus_tag=Rv1770] [location=2003878..2005164]	1287	3.90289	0.007415	164.495	42.147
Rv1638	[gene=uvrA] [locus_tag=Rv1638] [location=1843741..1846659]	2919	3.89559	0.002903	445.897	114.462
Rv0494	[locus_tag=Rv0494] [location=584695..585423]	729	3.89307	0.009477	65.131	16.73
Rv2176	[gene=pknL] [locus_tag=Rv2176] [location=2437941..2439140]	1200	3.89273	0.006382	141.933	36.461
Rv2885c	[locus_tag=Rv2885c] [location=complement(3194166..3195548)]	1383	3.88948	0.004788	263.699	67.798
Rv1427c	[gene=fadD12] [locus_tag=Rv1427c] [location=complement(1602321..1603928)]	1608	3.88365	0.002104	75.906	19.545
Rv1250	[locus_tag=Rv1250] [location=1394179..1395918]	1740	3.87625	0.005917	89.677	23.135
Rv3466	[locus_tag=Rv3466] [location=3883525..3884193]	669	3.86596	0.002104	165.038	42.69
Rv2436	[gene=rbsK] [locus_tag=Rv2436] [location=2733230..2734144]	915	3.86271	0.008419	92.342	23.906
Rv2657c	[locus_tag=Rv2657c] [location=complement(2979049..2979309)]	261	3.85714	0.002117	1762.42	456.923
Rv0927c	[locus_tag=Rv0927c] [location=complement(1033840..1034631)]	792	3.85302	0.005446	28.574	7.416
Rv0567	[locus_tag=Rv0567] [location=658321..659340]	1020	3.84559	0.004421	116.579	30.315
Rv1762c	[locus_tag=Rv1762c] [location=complement(1995054..1995842)]	789	3.8431	0.005246	27.924	7.266
Rv2496c	[gene=bkdB] [locus_tag=Rv2496c] [location=complement(2809936..2810982)]	1047	3.83989	0.00233	712.38	185.521
Rv3607c	[gene=folB] [locus_tag=Rv3607c] [location=complement(4048744..4049145)]	402	3.83749	0.004007	267.561	69.723
Rv0918	[locus_tag=Rv0918] [location=1024211..1024687]	477	3.83012	0.001418	82.677	21.586
Rv2138	[gene=lppL] [locus_tag=Rv2138] [location=2397330..2398406]	1077	3.82444	0.008419	274.117	71.675
Rv0438c	[gene=moeA2] [locus_tag=Rv0438c] [location=complement(526143..527360)]	1218	3.81575	0.001184	118.357	31.018
Rv1422	[locus_tag=Rv1422] [location=1596881..1597909]	1029	3.81464	0.00229	289.52	75.897
Rv1952	[gene=vapB14] [locus_tag=Rv1952] [location=2200726..2200941]	216	3.80966	0.002339	318.023	83.478
Rv3793	[gene=embC] [locus_tag=Rv3793] [location=4239863..4243147]	3285	3.80912	0.003431	62.283	16.351
Rv1293	[gene=lysA] [locus_tag=Rv1293] [location=1448028..1449371]	1344	3.80404	0.008246	597.105	156.966
Rv1493	[gene=mutB] [locus_tag=Rv1493] [location=1684005..1686257]	2253	3.79751	0.00852	266.665	70.221
Rv2015c	[locus_tag=Rv2015c] [location=complement(2261816..2263072)]	1257	3.79717	0.008067	600.758	158.212
Rv1407	[gene=fmu] [locus_tag=Rv1407] [location=1583101..1584474]	1374	3.79221	0.007015	158.431	41.778
Rv2218	[gene=lipA] [locus_tag=Rv2218] [location=2485273..2486208]	936	3.77559	0.01	343.465	90.97
Rv3909	[locus_tag=Rv3909] [location=4394192..4396600]	2409	3.76744	0.00724	175.653	46.624
Rv3261	[gene=fbiA] [locus_tag=Rv3261] [location=3640543..3641538]	996	3.76256	0.002117	95.776	25.455
Rv3156	[gene=nuoL] [locus_tag=Rv3156] [location=3522234..3524135]	1902	3.76226	0.001209	335.029	89.05
Rv1359	[locus_tag=Rv1359] [location=1530173..1530925]	753	3.75702	0.009836	170.997	45.514
Rv1922	[locus_tag=Rv1922] [location=2174067..2175182]	1116	3.75619	0.002104	67.679	18.018
Rv1866	[locus_tag=Rv1866] [location=2113140..2115476]	2337	3.74536	0.001628	25.019	6.68
Rv2852c	[gene=mqo] [locus_tag=Rv2852c] [location=complement(3160580..3162061)]	1482	3.74496	0.003127	514.595	137.41
Rv3691	[locus_tag=Rv3691] [location=4132518..4133519]	1002	3.74432	0.007189	137.308	36.671
Rv2681	[locus_tag=Rv2681] [location=2996739..2998055]	1317	3.74265	0.004368	214.147	57.218
Rv1021	[locus_tag=Rv1021] [location=1142671..1143648]	978	3.74084	0.007815	152.301	40.713
Rv3419c	[gene=gcp] [locus_tag=Rv3419c] [location=complement(3837555..3838589)]	1035	3.73768	0.00229	470.563	125.897
Rv0862c	[locus_tag=Rv0862c] [location=complement(960342..962612)]	2271	3.73484	0.002117	80.68	21.602
Rv3354	[locus_tag=Rv3354] [location=3769111..3769500]	390	3.73391	0.004864	78.651	21.064
Rv0629c	[gene=recD] [locus_tag=Rv0629c] [location=complement(720005..721732)]	1728	3.72975	0.00229	69.295	18.579
Rv0037c	[locus_tag=Rv0037c] [location=complement(39877..41202)]	1326	3.71675	0.003482	92.681	24.936
Rv1660	[gene=pks10] [locus_tag=Rv1660] [location=1874160..1875221]	1062	3.71401	0.00972	134.098	36.106
Rv1547	[gene=dnaE1] [locus_tag=Rv1547] [location=1747694..1751248]	3555	3.71309	0.009381	149.051	40.142
Rv1603	[gene=hisA] [locus_tag=Rv1603] [location=1803294..1804031]	738	3.71251	0.003535	699.622	188.45
Rv3387	[locus_tag=Rv3387] [location=3800786..3801463]	678	3.70998	0.00591	37.315	10.058
Rv1898	[locus_tag=Rv1898] [location=2144940..2145248]	309	3.70972	0.003328	818.317	220.587
Rv0590	[gene=mce2B] [locus_tag=Rv0590] [location=688032..688859]	828	3.70566	0.004007	154.574	41.713
Rv0663	[gene=atsD] [locus_tag=Rv0663] [location=756137..758500]	2364	3.70451	0.006927	174.812	47.189
Rv2265	[locus_tag=Rv2265] [location=2538700..2539929]	1230	3.70335	0.009548	16.354	4.416
Rv3262	[gene=fbiB] [locus_tag=Rv3262] [location=3641535..3642881]	1347	3.70265	0.002409	81.762	22.082
Rv0131c	[gene=fadE1] [locus_tag=Rv0131c] [location=complement(158315..159658)]	1344	3.70242	0.004124	65.729	17.753
Rv0505c	[gene=serB1] [locus_tag=Rv0505c] [location=complement(595464..596585)]	1122	3.70123	0.00591	136.705	36.935
Rv0204c	[locus_tag=Rv0204c] [location=complement(241976..243214)]	1239	3.70045	0.007044	175.553	47.441
Rv2454c	[locus_tag=Rv2454c] [location=complement(2753625..2754746)]	1122	3.70025	0.007691	1161.37	313.863
Rv1292	[gene=argS] [locus_tag=Rv1292] [location=1446379..1448031]	1653	3.69256	0.001628	241.933	65.519
Rv2683	[locus_tag=Rv2683] [location=3000112..3000609]	498	3.69142	0.005518	112.795	30.556
Rv1186c	[locus_tag=Rv1186c] [location=complement(1327689..1329305)]	1617	3.68912	0.006571	191.174	51.821
Rv1910c	[locus_tag=Rv1910c] [location=complement(2156706..2157299)]	594	3.68563	0.009347	79.547	21.583
Rv1580c	[locus_tag=Rv1580c] [location=complement(1783620..1783892)]	273	3.68205	0.002862	121.758	33.068
Rv1000c	[locus_tag=Rv1000c] [location=complement(1116531..1117148)]	618	3.67773	0.004642	458.473	124.662
Rv3395c	[locus_tag=Rv3395c] [location=complement(3811022..3811636)]	615	3.6777	0.007415	39.23	10.667
Rv1423	[gene=whiA] [locus_tag=Rv1423] [location=1597906..1598883]	978	3.6705	0.006194	137.086	37.348
Rv0628c	[locus_tag=Rv0628c] [location=complement(718761..719912)]	1152	3.66946	0.008489	330.02	89.937
Rv1052	[locus_tag=Rv1052] [location=1175723..1176112]	390	3.66468	0.004863	206.45	56.335
Rv0173	[gene=lprK] [locus_tag=Rv0173] [location=204065..205237]	1173	3.66288	0.003708	206.755	56.446
Rv0154c	[gene=fadE2] [locus_tag=Rv0154c] [location=complement(181987..183198)]	1212	3.66023	0.003115	148.199	40.489
Rv3393	[gene=iunH] [locus_tag=Rv3393] [location=3808461..3809387]	927	3.66019	0.001683	75.118	20.523
Rv0169	[gene=mce1A] [locus_tag=Rv0169] [location=198534..199898]	1365	3.65662	0.009004	184.546	50.469
Rv1696	[gene=recN] [locus_tag=Rv1696] [location=1919683..1921446]	1764	3.65295	0.003887	120.529	32.995
Rv2672	[locus_tag=Rv2672] [location=2987682..2989268]	1587	3.65085	0.007532	128.948	35.32
Rv0338c	[locus_tag=Rv0338c] [location=complement(403193..405841)]	2649	3.65047	0.01	299.452	82.031
Rv1676	[locus_tag=Rv1676] [location=1901047..1901751]	705	3.6454	0.002581	504.381	138.361
Rv2096c	[gene=pafB] [locus_tag=Rv2096c] [location=complement(2354312..2355310)]	999	3.63448	0.006888	278.514	76.631
Rv0615	[locus_tag=Rv0615] [location=710345..710587]	243	3.6326	0.007228	227.419	62.605
Rv3794	[gene=embA] [locus_tag=Rv3794] [location=4243233..4246517]	3285	3.63111	0.002641	69.641	19.179
Rv2581c	[locus_tag=Rv2581c] [location=complement(2906089..2906763)]	675	3.62255	0.003982	458.162	126.475
Rv3816c	[locus_tag=Rv3816c] [location=complement(4280792..4281571)]	780	3.61784	0.008067	450.863	124.622
Rv1022	[gene=lpqU] [locus_tag=Rv1022] [location=1143736..1144467]	732	3.59832	0.008564	104.38	29.008
Rv2794c	[gene=pptT] [locus_tag=Rv2794c] [location=complement(3103257..3103940)]	684	3.58831	0.004448	475.171	132.422
Rv3692	[gene=moxR2] [locus_tag=Rv3692] [location=4133516..4134592]	1077	3.58632	0.001683	94.826	26.441
Rv3386	[locus_tag=Rv3386] [location=3800092..3800796]	705	3.58434	0.004448	24.947	6.96
Rv0444c	[gene=rskA] [locus_tag=Rv0444c] [location=complement(533091..533789)]	699	3.57342	0.002104	289.19	80.928
Rv2449c	[locus_tag=Rv2449c] [location=complement(2750313..2751572)]	1260	3.57303	0.001774	391.318	109.52
Rv2521	[gene=bcp] [locus_tag=Rv2521] [location=2837684..2838157]	474	3.56942	0.002346	224.588	62.92
Rv1842c	[locus_tag=Rv1842c] [location=complement(2090718..2092085)]	1368	3.55811	0.009132	529.005	148.676
Rv0153c	[gene=ptbB] [locus_tag=Rv0153c] [location=complement(181155..181985)]	831	3.55723	0.00333	138.483	38.93
Rv2101	[gene=helZ] [locus_tag=Rv2101] [location=2360240..2363281]	3042	3.54892	0.002721	115.269	32.48
Rv0118c	[gene=oxcA] [locus_tag=Rv0118c] [location=complement(142128..143876)]	1749	3.54779	0.00229	43.166	12.167
Rv2008c	[locus_tag=Rv2008c] [location=complement(2256617..2257942)]	1326	3.54726	0.00474	52.918	14.918
Rv0360c	[locus_tag=Rv0360c] [location=complement(438302..438739)]	438	3.54428	0.01	20.369	5.747
Rv1836c	[locus_tag=Rv1836c] [location=complement(2082603..2084636)]	2034	3.54129	0.004448	610.649	172.437
Rv0753c	[gene=mmsA] [locus_tag=Rv0753c] [location=complement(844421..845953)]	1533	3.53295	0.00972	238.407	67.481
Rv1947	[locus_tag=Rv1947] [location=2198024..2198425]	402	3.53239	0.003753	57.087	16.161
Rv3114	[locus_tag=Rv3114] [location=3480759..3481289]	531	3.52476	0.008267	27.613	7.834
Rv1496	[locus_tag=Rv1496] [location=1686884..1687888]	1005	3.51626	0.009381	115.801	32.933
Rv0137c	[gene=msrA] [locus_tag=Rv0137c] [location=complement(164712..165260)]	549	3.50638	0.001683	313.067	89.285
Rv0524	[gene=hemL] [locus_tag=Rv0524] [location=614835..616223]	1389	3.50403	0.004525	567.092	161.84
Rv3818	[locus_tag=Rv3818] [location=4282449..4283999]	1551	3.50217	0.008957	97.532	27.849
Rv0931c	[gene=pknD] [locus_tag=Rv0931c] [location=complement(1037920..1039914)]	1995	3.49854	0.00271	2265.23	647.478
Rv3494c	[gene=mce4F] [locus_tag=Rv3494c] [location=complement(3911675..3913369)]	1695	3.49702	0.01	81.631	23.343
Rv0334	[gene=rmlA] [locus_tag=Rv0334] [location=398658..399524]	867	3.49422	0.003535	46.826	13.401
Rv1801	[gene=PPE29] [locus_tag=Rv1801] [location=2042001..2043272]	1272	3.49128	0.00392	29.243	8.376
Rv0772	[gene=purD] [locus_tag=Rv0772] [location=864586..865854]	1269	3.48729	0.002694	56.243	16.128
Rv1569	[gene=bioF1] [locus_tag=Rv1569] [location=1776702..1777862]	1161	3.48718	0.002104	87.197	25.005
Rv0418	[gene=lpqL] [locus_tag=Rv0418] [location=503496..504998]	1503	3.4832	0.004642	156.152	44.83
Rv2788	[gene=sirR] [locus_tag=Rv2788] [location=3096959..3097645]	687	3.48069	0.009154	239.249	68.736
Rv1267c	[gene=embR] [locus_tag=Rv1267c] [location=complement(1416181..1417347)]	1167	3.48006	0.01	33.948	9.755
Rv1256c	[gene=cyp130] [locus_tag=Rv1256c] [location=complement(1403386..1404603)]	1218	3.47537	0.004775	109.283	31.445
Rv2316	[gene=uspA] [locus_tag=Rv2316] [location=2588838..2589710]	873	3.47482	0.006227	10.97	3.157
Rv1618	[gene=tesB1] [locus_tag=Rv1618] [location=1817615..1818517]	903	3.47362	0.002104	238.162	68.563
Rv1290A	[locus_tag=Rv1290A] [location=1445058..1445372]	315	3.47361	0.01	41.718	12.01
Rv3790	[gene=dprE1] [locus_tag=Rv3790] [location=4235779..4237164]	1386	3.45944	0.004775	37.016	10.7
Rv1473	[locus_tag=Rv1473] [location=1660656..1662284]	1629	3.4576	0.003704	270.564	78.252
Rv1060	[locus_tag=Rv1060] [location=1183508..1183981]	474	3.45618	0.006054	98.743	28.57
Rv2850c	[locus_tag=Rv2850c] [location=complement(3158165..3160054)]	1890	3.44046	0.003326	310.268	90.182
Rv3560c	[gene=fadE30] [locus_tag=Rv3560c] [location=complement(4000432..4001589)]	1158	3.42588	0.004448	30.23	8.824
Rv0588	[gene=yrbE2B] [locus_tag=Rv0588] [location=685928..686815]	888	3.42207	0.003441	250.68	73.254
Rv0754	[gene=PE_PGRS11] [locus_tag=Rv0754] [location=846159..847913]	1755	3.42167	0.005154	48.468	14.165
Rv0861c	[gene=ercc3] [locus_tag=Rv0861c] [location=complement(958523..960151)]	1629	3.41665	0.009115	199.03	58.253
Rv3838c	[gene=pheA] [locus_tag=Rv3838c] [location=complement(4311704..4312669)]	966	3.41475	0.005532	285.234	83.53
Rv0101	[gene=nrp] [locus_tag=Rv0101] [location=110001..117539]	7539	3.41362	0.01	84.214	24.67
Rv3222c	[locus_tag=Rv3222c] [location=complement(3598353..3598904)]	552	3.413	0.00591	209.459	61.371
Rv2064	[gene=cobG] [locus_tag=Rv2064] [location=2321451..2322542]	1092	3.40399	0.002861	151.389	44.474
Rv3255c	[gene=manA] [locus_tag=Rv3255c] [location=complement(3635041..3636267)]	1227	3.40146	0.002419	291.57	85.719
Rv2284	[gene=lipM] [locus_tag=Rv2284] [location=2556145..2557440]	1296	3.39762	0.004549	103.855	30.567
Rv2308	[locus_tag=Rv2308] [location=2580419..2581135]	717	3.38822	0.00724	65.152	19.229
Rv2732c	[locus_tag=Rv2732c] [location=complement(3044375..3044989)]	615	3.37978	0.002405	269.392	79.707
Rv2572c	[gene=aspS] [locus_tag=Rv2572c] [location=complement(2896013..2897803)]	1791	3.37519	0.005463	76.313	22.61
Rv0946c	[gene=pgi] [locus_tag=Rv0946c] [location=complement(1055024..1056685)]	1662	3.37123	0.008188	122.251	36.263
Rv3721c	[gene=dnaZX] [locus_tag=Rv3721c] [location=complement(4164995..4166731)]	1737	3.37114	0.00229	178.596	52.978
Rv2671	[gene=ribD] [locus_tag=Rv2671] [location=2986839..2987615]	777	3.36991	0.002104	40.23	11.938
Rv1366	[locus_tag=Rv1366] [location=1538390..1539211]	822	3.36898	0.001418	28.953	8.594
Rv0844c	[gene=narL] [locus_tag=Rv0844c] [location=complement(940456..941106)]	651	3.36134	0.00724	211.092	62.8
Rv2925c	[gene=rnc] [locus_tag=Rv2925c] [location=complement(3239829..3240551)]	723	3.35942	0.004368	949.912	282.761
Rv0547c	[locus_tag=Rv0547c] [location=complement(638032..638916)]	885	3.35633	0.008337	155.247	46.255
Rv3223c	[gene=sigH] [locus_tag=Rv3223c] [location=complement(3598901..3599551)]	651	3.35201	0.002346	316.735	94.491
Rv2787	[locus_tag=Rv2787] [location=3095111..3096874]	1764	3.34735	0.002144	56.376	16.842
Rv2992c	[gene=gltS] [locus_tag=Rv2992c] [location=complement(3348805..3350277)]	1473	3.34086	0.008899	138.549	41.471
Rv1517	[locus_tag=Rv1517] [location=1708871..1709635]	765	3.34059	0.003326	15.34	4.592
Rv3204	[locus_tag=Rv3204] [location=3581315..3581620]	306	3.33478	0.002104	219.025	65.679
Rv3015c	[locus_tag=Rv3015c] [location=complement(3374651..3375664)]	1014	3.33382	0.003882	32.258	9.676
Rv0373c	[locus_tag=Rv0373c] [location=complement(449404..451803)]	2400	3.33333	0.006571	17.7	5.31
Rv3451	[gene=cut3] [locus_tag=Rv3451] [location=3872617..3873405]	789	3.33271	0.001683	194.49	58.358
Rv3860	[locus_tag=Rv3860] [location=4336777..4337949]	1173	3.33118	0.006084	30.367	9.116
Rv0465c	[locus_tag=Rv0465c] [location=complement(554882..556306)]	1425	3.33068	0.007548	76.679	23.022
Rv1703c	[locus_tag=Rv1703c] [location=complement(1929131..1929721)]	591	3.32077	0.008951	230.242	69.334
Rv3829c	[locus_tag=Rv3829c] [location=complement(4303398..4305008)]	1611	3.32049	0.008951	25.156	7.576
Rv1562c	[gene=treZ] [locus_tag=Rv1562c] [location=complement(1765400..1767142)]	1743	3.3121	0.001184	73.979	22.336
Rv2477c	[locus_tag=Rv2477c] [location=complement(2782366..2784042)]	1677	3.30747	0.001245	567.353	171.537
Rv1352	[locus_tag=Rv1352] [location=1518763..1519134]	372	3.29966	0.006822	344.366	104.364
Rv0462	[gene=lpdC] [locus_tag=Rv0462] [location=552614..554008]	1395	3.28736	0.003982	392.382	119.361
Rv2609c	[locus_tag=Rv2609c] [location=complement(2936810..2937865)]	1056	3.27991	0.004448	151.64	46.233
Rv3498c	[gene=mce4B] [locus_tag=Rv3498c] [location=complement(3916946..3917998)]	1053	3.27425	0.007185	112.703	34.421
Rv0219	[locus_tag=Rv0219] [location=262254..262802]	549	3.26916	0.00492	12.243	3.745
Rv3014c	[gene=ligA] [locus_tag=Rv3014c] [location=complement(3372545..3374620)]	2076	3.26246	0.005871	58.695	17.991
Rv0498	[locus_tag=Rv0498] [location=588325..589167]	843	3.26006	0.007415	85.482	26.221
Rv3055	[locus_tag=Rv3055] [location=3416081..3416695]	615	3.25128	0.009835	47.072	14.478
Rv0497	[locus_tag=Rv0497] [location=587377..588309]	933	3.24996	0.00229	191.533	58.934
Rv1527c	[gene=pks5] [locus_tag=Rv1527c] [location=complement(1722083..1728409)]	6327	3.24897	0.008735	57.341	17.649
Rv3791	[gene=dprE2] [locus_tag=Rv3791] [location=4237165..4237929]	765	3.24503	0.002104	47.001	14.484
Rv3071	[locus_tag=Rv3071] [location=3434464..3435573]	1110	3.24431	0.003708	44.168	13.614
Rv0397A	[locus_tag=Rv0397A] [location=476394..476642]	249	3.23417	0.004642	317.673	98.224
Rv0417	[gene=thiG] [locus_tag=Rv0417] [location=502366..503124]	759	3.23288	0.002378	35.927	11.113
Rv2399c	[gene=cysT] [locus_tag=Rv2399c] [location=complement(2695796..2696647)]	852	3.23266	0.00538	110.195	34.088
Rv2299c	[gene=htpG] [locus_tag=Rv2299c] [location=complement(2570059..2572002)]	1944	3.23061	0.009939	71.571	22.154
Rv0688	[locus_tag=Rv0688] [location=787940..789160]	1221	3.22979	0.006575	125.277	38.788
Rv2149c	[gene=yfiH] [locus_tag=Rv2149c] [location=complement(2407622..2408374)]	753	3.22547	0.005175	375.448	116.401
Rv2453c	[gene=mobA] [locus_tag=Rv2453c] [location=complement(2753018..2753623)]	606	3.22197	0.006194	282.515	87.684
Rv1568	[gene=bioA] [locus_tag=Rv1568] [location=1775392..1776705]	1314	3.22163	0.001184	46.762	14.515
Rv0266c	[gene=oplA] [locus_tag=Rv0266c] [location=complement(317525..321154)]	3630	3.2152	0.001846	75.496	23.481
Rv2282c	[locus_tag=Rv2282c] [location=complement(2554938..2555876)]	939	3.21377	0.008717	18.627	5.796
Rv0528	[locus_tag=Rv0528] [location=618305..619894]	1590	3.2088	0.00229	323.569	100.838
Rv2486	[gene=echA14] [locus_tag=Rv2486] [location=2794350..2795120]	771	3.20877	0.006194	153.392	47.804
Rv2232	[gene=ptkA] [locus_tag=Rv2232] [location=2506278..2507153]	876	3.20014	0.004864	115.794	36.184
Rv2589	[gene=gabT] [locus_tag=Rv2589] [location=2916360..2917709]	1350	3.19593	0.008564	278.592	87.171
Rv2417c	[locus_tag=Rv2417c] [location=complement(2715472..2716314)]	843	3.18895	0.008079	101.97	31.976
Rv1125	[locus_tag=Rv1125] [location=1248082..1249326]	1245	3.18594	0.003326	71.569	22.464
Rv0889c	[gene=citA] [locus_tag=Rv0889c] [location=complement(988740..989861)]	1122	3.1854	0.00591	263.178	82.62
Rv0180c	[locus_tag=Rv0180c] [location=complement(210892..212250)]	1359	3.1852	0.004084	112.581	35.345
Rv3075c	[locus_tag=Rv3075c] [location=complement(3438050..3438973)]	924	3.18516	0.001245	413.236	129.738
Rv3811	[locus_tag=Rv3811] [location=4274798..4276417]	1620	3.18477	0.01	350.548	110.07
Rv1854c	[gene=ndh] [locus_tag=Rv1854c] [location=complement(2101651..2103042)]	1392	3.18269	0.003975	761.849	239.373
Rv3265c	[gene=wbbL1] [locus_tag=Rv3265c] [location=complement(3645979..3646884)]	906	3.17967	0.00233	179.009	56.298
Rv1133c	[gene=metE] [locus_tag=Rv1133c] [location=complement(1259067..1261346)]	2280	3.17904	0.004332	1720.88	541.321
Rv2065	[gene=cobH] [locus_tag=Rv2065] [location=2322552..2323178]	627	3.17897	0.004649	78.403	24.663
Rv3707c	[locus_tag=Rv3707c] [location=complement(4150030..4151040)]	1011	3.17101	0.008337	117.467	37.044
Rv1651c	[gene=PE_PGRS30] [locus_tag=Rv1651c] [location=complement(1862347..1865382)]	3036	3.1658	0.01	46.493	14.686
Rv1355c	[gene=moeY] [locus_tag=Rv1355c] [location=complement(1521885..1524032)]	2148	3.15859	0.008583	138.64	43.893
Rv1088	[gene=PE9] [locus_tag=Rv1088] [location=1214513..1214947]	435	3.15479	0.002104	12.534	3.973
Rv2141c	[locus_tag=Rv2141c] [location=complement(2400376..2401722)]	1347	3.15466	0.001671	125.991	39.938
Rv0160c	[gene=PE4] [locus_tag=Rv0160c] [location=complement(188931..190439)]	1509	3.15148	0.00992	8.717	2.766
Rv3214	[gene=gpm2] [locus_tag=Rv3214] [location=3591646..3592257]	612	3.14984	0.003484	147.756	46.909
Rv3309c	[gene=upp] [locus_tag=Rv3309c] [location=complement(3696470..3697093)]	624	3.14329	0.006084	49.095	15.619
Rv1123c	[gene=bpoB] [locus_tag=Rv1123c] [location=complement(1246144..1247052)]	909	3.14209	0.004864	157.073	49.99
Rv3562	[gene=fadE31] [locus_tag=Rv3562] [location=4003161..4004294]	1134	3.13664	0.005385	49.769	15.867
Rv1900c	[gene=lipJ] [locus_tag=Rv1900c] [location=complement(2146245..2147633)]	1389	3.13173	0.00233	368.577	117.691
Rv0135c	[locus_tag=Rv0135c] [location=complement(162644..163249)]	606	3.12795	0.005668	300.796	96.164
Rv3814c	[locus_tag=Rv3814c] [location=complement(4279230..4280015)]	786	3.1224	0.007415	236.397	75.71
Rv3410c	[gene=guaB3] [locus_tag=Rv3410c] [location=complement(3828783..3829910)]	1128	3.11607	0.007108	234.637	75.299
Rv0817c	[locus_tag=Rv0817c] [location=complement(910030..910842)]	813	3.11524	0.008999	24.168	7.758
Rv2214c	[gene=ephD] [locus_tag=Rv2214c] [location=complement(2479923..2481701)]	1779	3.11026	0.006449	259.309	83.372
Rv2858c	[gene=aldC] [locus_tag=Rv2858c] [location=complement(3169356..3170723)]	1368	3.10912	0.00538	170.383	54.801
Rv1295	[gene=thrC] [locus_tag=Rv1295] [location=1450697..1451779]	1083	3.10704	0.002117	763.741	245.81
Rv1677	[gene=dsbF] [locus_tag=Rv1677] [location=1901748..1902296]	549	3.10657	0.006407	356.584	114.784
Rv3699	[locus_tag=Rv3699] [location=4142044..4142745]	702	3.10542	0.00331	234.133	75.395
Rv0811c	[locus_tag=Rv0811c] [location=complement(905234..906340)]	1107	3.09692	0.00229	245.149	79.159
Rv1984c	[gene=cfp21] [locus_tag=Rv1984c] [location=complement(2227908..2228561)]	654	3.09196	0.00396	71.48	23.118
Rv1814	[gene=erg3] [locus_tag=Rv1814] [location=2056521..2057423]	903	3.08954	0.006101	82.704	26.769
Rv1689	[gene=tyrS] [locus_tag=Rv1689] [location=1913602..1914876]	1275	3.08952	0.008157	81.276	26.307
Rv3792	[gene=aftA] [locus_tag=Rv3792] [location=4237932..4239863]	1932	3.08095	0.007691	26.413	8.573
Rv1860	[gene=apa] [locus_tag=Rv1860] [location=2107736..2108713]	978	3.07327	0.005274	51.382	16.719
Rv1634	[locus_tag=Rv1634] [location=1839168..1840583]	1416	3.07201	0.004626	337.694	109.926
Rv0023	[locus_tag=Rv0023] [location=27595..28365]	771	3.0696	0.008097	75.46	24.583
Rv3714c	[locus_tag=Rv3714c] [location=complement(4158931..4159821)]	891	3.06657	0.005148	58.136	18.958
Rv0435c	[locus_tag=Rv0435c] [location=complement(522347..524533)]	2187	3.06038	0.001683	155.394	50.776
Rv1668c	[locus_tag=Rv1668c] [location=complement(1894224..1895342)]	1119	3.06028	0.009535	51.018	16.671
Rv0184	[locus_tag=Rv0184] [location=214969..215718]	750	3.05515	0.003842	196.816	64.421
Rv0132c	[gene=fgd2] [locus_tag=Rv0132c] [location=complement(159700..160782)]	1083	3.05154	0.003109	54.525	17.868
Rv3245c	[gene=mtrB] [locus_tag=Rv3245c] [location=complement(3624910..3626613)]	1704	3.04944	0.01	545.506	178.887
Rv2881c	[gene=cdsA] [locus_tag=Rv2881c] [location=complement(3190701..3191621)]	921	3.04745	0.006571	158.458	51.997
Rv0172	[gene=mce1D] [locus_tag=Rv0172] [location=202476..204068]	1593	3.0446	0.005501	168.552	55.361
Rv0838	[gene=lpqR] [locus_tag=Rv0838] [location=934720..935490]	771	3.04427	0.002931	67.385	22.135
Rv2773c	[gene=dapB] [locus_tag=Rv2773c] [location=complement(3081604..3082341)]	738	3.04222	0.002419	179.272	58.928
Rv1100	[locus_tag=Rv1100] [location=1228683..1229384]	702	3.03281	0.007532	326.273	107.581
Rv3394c	[locus_tag=Rv3394c] [location=complement(3809442..3811025)]	1584	3.03044	0.007193	39.826	13.142
Rv3690	[locus_tag=Rv3690] [location=4131739..4132392]	654	3.02685	0.005518	57.719	19.069
Rv0063	[locus_tag=Rv0063] [location=66923..68362]	1440	3.02454	0.002117	43.508	14.385
Rv3343c	[gene=PPE54] [locus_tag=Rv3343c] [location=complement(3729364..3736935)]	7572	3.01995	0.009268	39.815	13.184
Rv3886c	[gene=mycP2] [locus_tag=Rv3886c] [location=complement(4368518..4370170)]	1653	3.01705	0.008206	85.82	28.445
Rv0134	[gene=ephF] [locus_tag=Rv0134] [location=161771..162673]	903	3.00595	0.002349	423.569	140.91
Rv3171c	[gene=hpx] [locus_tag=Rv3171c] [location=complement(3539846..3540745)]	900	3.00582	0.007096	232.293	77.281
Rv2583c	[gene=relA] [locus_tag=Rv2583c] [location=complement(2907826..2910198)]	2373	3.00166	0.004227	470.783	156.841
Rv0015c	[gene=pknA] [locus_tag=Rv0015c] [location=complement(17467..18762)]	1296	2.99604	0.002804	425.638	142.067
Rv1007c	[gene=metS] [locus_tag=Rv1007c] [location=complement(1125444..1127003)]	1560	2.99397	0.007541	118.214	39.484
Rv0616c	[locus_tag=Rv0616c] [location=complement(710584..710850)]	267	2.99247	0.00804	93.401	31.212
Rv2482c	[gene=plsB2] [locus_tag=Rv2482c] [location=complement(2786914..2789283)]	2370	2.98652	0.00756	258.803	86.657
Rv1927	[locus_tag=Rv1927] [location=2179673..2180446]	774	2.98473	0.006575	278.899	93.442
Rv0534c	[gene=menA] [locus_tag=Rv0534c] [location=complement(625562..626440)]	879	2.9754	0.01	19.349	6.503
Rv1294	[gene=thrA] [locus_tag=Rv1294] [location=1449375..1450700]	1326	2.97326	0.002409	471.229	158.489
Rv1564c	[gene=treX] [locus_tag=Rv1564c] [location=complement(1769436..1771601)]	2166	2.97203	0.008081	99.474	33.47
Rv0430	[locus_tag=Rv0430] [location=518733..519041]	309	2.9717	0.006888	41.589	13.995
Rv2475c	[locus_tag=Rv2475c] [location=complement(2776975..2777391)]	417	2.97032	0.01	270.679	91.128
Rv0488	[locus_tag=Rv0488] [location=577664..578269]	606	2.96934	0.00804	37.675	12.688
Rv2895c	[gene=viuB] [locus_tag=Rv2895c] [location=complement(3204381..3205232)]	852	2.96863	0.00372	219.168	73.828
Rv2921c	[gene=ftsY] [locus_tag=Rv2921c] [location=complement(3232871..3234139)]	1269	2.96785	0.006084	235.036	79.194
Rv0896	[gene=gltA2] [locus_tag=Rv0896] [location=999472..1000767]	1296	2.96708	0.005668	496.506	167.338
Rv1181	[gene=pks4] [locus_tag=Rv1181] [location=1315234..1319982]	4749	2.96259	0.002774	252.276	85.154
Rv0456c	[gene=echA2] [locus_tag=Rv0456c] [location=complement(545889..546803)]	915	2.95771	0.008677	29.932	10.12
Rv0530	[locus_tag=Rv0530] [location=620907..622124]	1218	2.95537	0.003326	290.537	98.308
Rv0050	[gene=ponA1] [locus_tag=Rv0050] [location=53663..55699]	2037	2.95089	0.008957	333.628	113.06
Rv2982c	[gene=gpdA2] [locus_tag=Rv2982c] [location=complement(3337995..3338999)]	1005	2.9479	0.002339	126.518	42.918
Rv0174	[gene=mce1F] [locus_tag=Rv0174] [location=205231..206778]	1548	2.94698	0.006971	398.55	135.24
Rv3356c	[gene=folD] [locus_tag=Rv3356c] [location=complement(3769804..3770649)]	846	2.9345	0.001184	151.526	51.636
Rv3493c	[locus_tag=Rv3493c] [location=complement(3910947..3911675)]	729	2.92894	0.002061	108.74	37.126
Rv3044	[gene=fecB] [locus_tag=Rv3044] [location=3405136..3406215]	1080	2.92834	0.005518	244.874	83.622
Rv0036c	[locus_tag=Rv0036c] [location=complement(39056..39829)]	774	2.92763	0.003561	161.289	55.092
Rv1840c	[gene=PE_PGRS34] [locus_tag=Rv1840c] [location=complement(2087971..2089518)]	1548	2.92643	0.006493	21.758	7.435
Rv0604	[gene=lpqO] [locus_tag=Rv0604] [location=700239..701189]	951	2.92457	0.00779	37.335	12.766
Rv2677c	[gene=hemY] [locus_tag=Rv2677c] [location=complement(2992634..2993992)]	1359	2.92372	0.004894	278.803	95.359
Rv0957	[gene=purH] [locus_tag=Rv0957] [location=1068205..1069776]	1572	2.9205	0.001577	84.236	28.843
Rv2567	[locus_tag=Rv2567] [location=2889795..2892449]	2655	2.91541	0.009809	88.2	30.253
Rv1201c	[gene=dapD] [locus_tag=Rv1201c] [location=complement(1344216..1345169)]	954	2.91526	0.002104	153.34	52.599
Rv3589	[gene=mutY] [locus_tag=Rv3589] [location=4030493..4031407]	915	2.9142	0.005532	55.399	19.01
Rv2842c	[locus_tag=Rv2842c] [location=complement(3149425..3149976)]	552	2.91338	0.004368	444.395	152.536
Rv1845c	[gene=blaR] [locus_tag=Rv1845c] [location=complement(2095218..2096168)]	951	2.91083	0.006393	490.737	168.59
Rv2604c	[gene=snoP] [locus_tag=Rv2604c] [location=complement(2931693..2932289)]	597	2.90882	0.008148	94.688	32.552
Rv0197	[locus_tag=Rv0197] [location=232231..234519]	2289	2.90557	0.00591	36.648	12.613
Rv0400c	[gene=fadE7] [locus_tag=Rv0400c] [location=complement(478566..479753)]	1188	2.90511	0.009458	185.625	63.896
Rv0974c	[gene=accD2] [locus_tag=Rv0974c] [location=complement(1085756..1087345)]	1590	2.89297	0.002339	47.462	16.406
Rv0520	[locus_tag=Rv0520] [location=612255..612605]	351	2.89066	0.004893	17.422	6.027
Rv1582c	[locus_tag=Rv1582c] [location=complement(1784497..1785912)]	1416	2.88941	0.00392	45.488	15.743
Rv0758	[gene=phoR] [locus_tag=Rv0758] [location=852396..853853]	1458	2.88869	0.009809	219.529	75.996
Rv3795	[gene=embB] [locus_tag=Rv3795] [location=4246514..4249810]	3297	2.881	0.003599	50.02	17.362
Rv1003	[locus_tag=Rv1003] [location=1120022..1120879]	858	2.87548	0.007914	29.698	10.328
Rv1492	[gene=mutA] [locus_tag=Rv1492] [location=1682157..1684004]	1848	2.87267	0.00538	397.304	138.305
Rv3077	[locus_tag=Rv3077] [location=3439541..3441352]	1812	2.86977	0.003882	33.364	11.626
Rv0895	[locus_tag=Rv0895] [location=997782..999299]	1518	2.85883	0.007415	14.803	5.178
Rv2676c	[locus_tag=Rv2676c] [location=complement(2991933..2992628)]	696	2.85651	0.00538	318.438	111.478
Rv2833c	[gene=ugpB] [locus_tag=Rv2833c] [location=complement(3139174..3140484)]	1311	2.85576	0.003326	31.382	10.989
Rv0448c	[locus_tag=Rv0448c] [location=complement(536504..537169)]	666	2.85237	0.007698	50.661	17.761
Rv0359	[locus_tag=Rv0359] [location=437518..438297]	780	2.84852	0.006888	30.801	10.813
Rv2791c	[locus_tag=Rv2791c] [location=complement(3100202..3101581)]	1380	2.84784	0.002409	774.708	272.034
Rv2605c	[gene=tesB2] [locus_tag=Rv2605c] [location=complement(2932297..2933142)]	846	2.84594	0.008419	279.631	98.256
Rv3064c	[locus_tag=Rv3064c] [location=complement(3429825..3430250)]	426	2.8413	0.006407	42.645	15.009
Rv3769	[locus_tag=Rv3769] [location=4214615..4214887]	273	2.84066	0.006703	253.978	89.408
Rv1749c	[locus_tag=Rv1749c] [location=complement(1977328..1977885)]	558	2.83454	0.00891	118.084	41.659
Rv3058c	[locus_tag=Rv3058c] [location=complement(3418726..3419376)]	651	2.82996	0.008521	132.264	46.737
Rv3090	[locus_tag=Rv3090] [location=3458211..3459098]	888	2.82992	0.01	15.757	5.568
Rv1296	[gene=thrB] [locus_tag=Rv1296] [location=1451997..1452947]	951	2.82954	0.006493	296.142	104.661
Rv2315c	[locus_tag=Rv2315c] [location=complement(2587287..2588804)]	1518	2.82844	0.00229	132.06	46.69
Rv2494	[gene=vapC38] [locus_tag=Rv2494] [location=2808310..2808735]	426	2.81178	0.01	399.967	142.247
Rv1096	[locus_tag=Rv1096] [location=1224385..1225260]	876	2.8092	0.001912	295.702	105.262
Rv2981c	[gene=ddlA] [locus_tag=Rv2981c] [location=complement(3336796..3337917)]	1122	2.80917	0.006933	257.983	91.836
Rv3800c	[gene=pks13] [locus_tag=Rv3800c] [location=complement(4255945..4261146)]	5202	2.80868	0.01	2284.1	813.231
Rv2798c	[locus_tag=Rv2798c] [location=complement(3107311..3107637)]	327	2.80746	0.008081	34.31	12.221
Rv0375c	[locus_tag=Rv0375c] [location=complement(452294..453154)]	861	2.80213	0.006888	10.791	3.851
Rv3579c	[locus_tag=Rv3579c] [location=complement(4021425..4022393)]	969	2.79938	0.009836	240.699	85.983
Rv0724	[gene=sppA] [locus_tag=Rv0724] [location=815663..817534]	1872	2.79867	0.003426	1451.9	518.781
Rv3910	[locus_tag=Rv3910] [location=4396597..4400151]	3555	2.79539	0.00229	215.578	77.119
Rv1931c	[locus_tag=Rv1931c] [location=complement(2182460..2183239)]	780	2.79441	0.005668	15.006	5.37
Rv2855	[gene=mtr] [locus_tag=Rv2855] [location=3165205..3166584]	1380	2.7919	0.008029	56.039	20.072
Rv3680	[locus_tag=Rv3680] [location=4119795..4120955]	1161	2.78474	0.006084	718.995	258.191
Rv2615c	[gene=PE_PGRS45] [locus_tag=Rv2615c] [location=complement(2943600..2944985)]	1386	2.78331	0.00804	18.715	6.724
Rv3170	[gene=aofH] [locus_tag=Rv3170] [location=3538505..3539851]	1347	2.78095	0.007179	97.656	35.116
Rv1619	[locus_tag=Rv1619] [location=1818575..1820029]	1455	2.77646	0.007415	118.216	42.578
Rv1377c	[locus_tag=Rv1377c] [location=complement(1550579..1551217)]	639	2.77524	0.00591	265.493	95.665
Rv0794c	[locus_tag=Rv0794c] [location=complement(887137..888636)]	1500	2.77354	0.004565	45.267	16.321
Rv3912	[locus_tag=Rv3912] [location=4400870..4401634]	765	2.77235	0.004011	13.116	4.731
Rv3432c	[gene=gadB] [locus_tag=Rv3432c] [location=complement(3850372..3851754)]	1383	2.76383	0.002694	47.267	17.102
Rv3295	[locus_tag=Rv3295] [location=3676066..3676731]	666	2.76225	0.009477	346.765	125.537
Rv3700c	[locus_tag=Rv3700c] [location=complement(4142748..4143920)]	1173	2.76158	0.003922	66.206	23.974
Rv2859c	[locus_tag=Rv2859c] [location=complement(3170720..3171646)]	927	2.75852	0.006442	128.354	46.53
Rv3516	[gene=echA19] [locus_tag=Rv3516] [location=3952544..3953335]	792	2.75768	0.008954	52.851	19.165
Rv0265c	[locus_tag=Rv0265c] [location=complement(316511..317503)]	993	2.75536	0.002104	76.07	27.608
Rv1364c	[locus_tag=Rv1364c] [location=complement(1535683..1537644)]	1962	2.74739	0.00968	124.707	45.391
Rv2325c	[locus_tag=Rv2325c] [location=complement(2597009..2597857)]	849	2.74402	0.002435	573.829	209.12
Rv1431	[locus_tag=Rv1431] [location=1608083..1609852]	1770	2.74216	0.005566	49.847	18.178
Rv3716c	[locus_tag=Rv3716c] [location=complement(4160512..4160913)]	402	2.73955	0.008069	143.755	52.474
Rv0492c	[locus_tag=Rv0492c] [location=complement(581489..583378)]	1890	2.73874	0.005518	69.386	25.335
Rv3368c	[locus_tag=Rv3368c] [location=complement(3780335..3780979)]	645	2.73648	0.004415	33.459	12.227
Rv0053	[gene=rpsF] [locus_tag=Rv0053] [location=58192..58482]	291	2.7362	0.006288	323.98	118.405
Rv3123	[locus_tag=Rv3123] [location=3488569..3489063]	495	2.73199	0.004969	48.807	17.865
Rv1356c	[locus_tag=Rv1356c] [location=complement(1524029..1524820)]	792	2.72929	0.003022	34.37	12.593
Rv2188c	[gene=pimB] [locus_tag=Rv2188c] [location=complement(2449993..2451150)]	1158	2.72532	0.006319	83.441	30.617
Rv2540c	[gene=aroF] [locus_tag=Rv2540c] [location=complement(2863207..2864412)]	1206	2.72496	0.008157	489.564	179.659
Rv2537c	[gene=aroD] [locus_tag=Rv2537c] [location=complement(2861148..2861591)]	444	2.71933	0.002154	518.1	190.525
Rv1458c	[locus_tag=Rv1458c] [location=complement(1643319..1644260)]	942	2.71762	0.007548	134.253	49.401
Rv2976c	[gene=ung] [locus_tag=Rv2976c] [location=complement(3332071..3332754)]	684	2.71715	0.007532	226.235	83.262
Rv2100	[locus_tag=Rv2100] [location=2358389..2360041]	1653	2.71648	0.006508	110.596	40.713
Rv2848c	[gene=cobB] [locus_tag=Rv2848c] [location=complement(3156148..3157521)]	1374	2.7135	0.003115	192.802	71.053
Rv2535c	[gene=pepQ] [locus_tag=Rv2535c] [location=complement(2859300..2860418)]	1119	2.71122	0.004084	402.301	148.384
Rv1911c	[gene=lppC] [locus_tag=Rv1911c] [location=complement(2157382..2157987)]	606	2.70688	0.002541	299.532	110.656
Rv3302c	[gene=glpD2] [locus_tag=Rv3302c] [location=complement(3687685..3689442)]	1758	2.70361	0.008024	123.817	45.797
Rv0626	[gene=vapB5] [locus_tag=Rv0626] [location=718025..718285]	261	2.70271	0.005386	391.028	144.68
Rv0972c	[gene=fadE12] [locus_tag=Rv0972c] [location=complement(1082584..1083750)]	1167	2.69861	0.007061	61.129	22.652
Rv0190	[locus_tag=Rv0190] [location=221871..222161]	291	2.69599	0.005385	269.472	99.953
Rv3009c	[gene=gatB] [locus_tag=Rv3009c] [location=complement(3367264..3368793)]	1530	2.68859	0.01	224.933	83.662
Rv3876	[gene=espI] [locus_tag=Rv3876] [location=4353010..4355010]	2001	2.68666	0.01	212.144	78.962
Rv2752c	[locus_tag=Rv2752c] [location=complement(3064515..3066191)]	1677	2.68329	0.009809	338.811	126.267
Rv3107c	[gene=agpS] [locus_tag=Rv3107c] [location=complement(3475378..3476961)]	1584	2.68128	0.004775	45.74	17.059
Rv0097	[locus_tag=Rv0097] [location=106734..107603]	870	2.67551	0.00233	15.724	5.877
Rv1782	[gene=eccB5] [locus_tag=Rv1782] [location=2017740..2019260]	1521	2.67373	0.006527	356.7	133.409
Rv0058	[gene=dnaB] [locus_tag=Rv0058] [location=60396..63020]	2625	2.67355	0.005668	191.167	71.503
Rv1609	[gene=trpE] [locus_tag=Rv1609] [location=1807903..1809453]	1551	2.6731	0.006933	211.656	79.18
Rv2361c	[locus_tag=Rv2361c] [location=complement(2642578..2643468)]	891	2.67293	0.01	244.963	91.646
Rv2488c	[locus_tag=Rv2488c] [location=complement(2797467..2800880)]	3414	2.67106	0.01	29.598	11.081
Rv3887c	[gene=eccD2] [locus_tag=Rv3887c] [location=complement(4370155..4371684)]	1530	2.66648	0.006382	60.625	22.736
Rv0051	[locus_tag=Rv0051] [location=55696..57378]	1683	2.66585	0.00343	112.608	42.241
Rv3689	[locus_tag=Rv3689] [location=4130357..4131712]	1356	2.66476	0.00271	112.04	42.045
Rv1373	[locus_tag=Rv1373] [location=1546012..1546992]	981	2.66431	0.008087	66.027	24.782
Rv3548c	[locus_tag=Rv3548c] [location=complement(3987382..3988296)]	915	2.66423	0.003022	93.922	35.253
Rv3010c	[gene=pfkA] [locus_tag=Rv3010c] [location=complement(3368823..3369854)]	1032	2.66343	0.01	191.192	71.784
Rv0894	[locus_tag=Rv0894] [location=996524..997705]	1182	2.66029	0.004683	31.277	11.757
Rv0018c	[gene=pstP] [locus_tag=Rv0018c] [location=complement(21637..23181)]	1545	2.65631	0.004565	472.008	177.693
Rv1336	[gene=cysM] [locus_tag=Rv1336] [location=1503394..1504365]	972	2.65415	0.008273	411.853	155.173
Rv1104	[locus_tag=Rv1104] [location=1231301..1231990]	690	2.65229	0.004097	52.38	19.749
Rv0660c	[gene=mazE2] [locus_tag=Rv0660c] [location=complement(754980..755225)]	246	2.65089	0.005148	590.037	222.581
Rv0805	[locus_tag=Rv0805] [location=898831..899787]	957	2.64774	0.01	813.257	307.151
Rv1337	[locus_tag=Rv1337] [location=1504356..1505078]	723	2.64426	0.004775	298.796	112.998
Rv0890c	[locus_tag=Rv0890c] [location=complement(989948..992596)]	2649	2.64123	0.002409	38.274	14.491
Rv2198c	[gene=mmpS3] [locus_tag=Rv2198c] [location=complement(2462148..2463047)]	900	2.63991	0.00538	264.004	100.005
Rv2219A	[locus_tag=Rv2219A] [location=complement(2486994..2487416)]	423	2.63557	0.00596	80.016	30.36
Rv3308	[gene=pmmB] [locus_tag=Rv3308] [location=3694864..3696468]	1605	2.63438	0.002694	44.11	16.744
Rv0546c	[locus_tag=Rv0546c] [location=complement(637583..637969)]	387	2.63319	0.0074	123.718	46.984
Rv0396	[locus_tag=Rv0396] [location=475350..475742]	393	2.63196	0.009198	12.815	4.869
Rv3552	[locus_tag=Rv3552] [location=3990771..3991523]	753	2.63115	0.006888	123.122	46.794
Rv0687	[locus_tag=Rv0687] [location=787099..787926]	828	2.62735	0.006382	46.462	17.684
Rv1012	[locus_tag=Rv1012] [location=1131128..1131421]	294	2.62562	0.004642	22.688	8.641
Rv1142c	[gene=echA10] [locus_tag=Rv1142c] [location=complement(1269152..1269958)]	807	2.62023	0.002981	221.839	84.664
Rv2418c	[locus_tag=Rv2418c] [location=complement(2716395..2717138)]	744	2.61968	0.01	67.42	25.736
Rv1025	[locus_tag=Rv1025] [location=1146561..1147028]	468	2.61838	0.008451	98.718	37.702
Rv3040c	[locus_tag=Rv3040c] [location=complement(3400192..3401058)]	867	2.61713	0.003727	124.696	47.646
Rv3553	[locus_tag=Rv3553] [location=3991621..3992688]	1068	2.61373	0.009276	71.854	27.491
Rv0897c	[locus_tag=Rv0897c] [location=complement(1000808..1002415)]	1608	2.61265	0.003326	229.265	87.752
Rv3835	[locus_tag=Rv3835] [location=4309047..4310396]	1350	2.60979	0.001245	122.352	46.882
Rv1430	[gene=PE16] [locus_tag=Rv1430] [location=1606386..1607972]	1587	2.60903	0.009809	192.158	73.651
Rv1746	[gene=pknF] [locus_tag=Rv1746] [location=1972138..1973568]	1431	2.60705	0.00623	80.829	31.004
Rv0263c	[locus_tag=Rv0263c] [location=complement(314864..315766)]	903	2.60321	0.01	144.08	55.347
Rv1809	[gene=PPE33] [locus_tag=Rv1809] [location=2051282..2052688]	1407	2.60253	0.00704	38.481	14.786
Rv2800	[locus_tag=Rv2800] [location=3108416..3110065]	1650	2.60041	0.007786	115.851	44.551
Rv0955	[locus_tag=Rv0955] [location=1066078..1067445]	1368	2.59791	0.005	129.802	49.964
Rv1208	[gene=gpgS] [locus_tag=Rv1208] [location=1352144..1353118]	975	2.5927	0.003755	102.588	39.568
Rv1747	[locus_tag=Rv1747] [location=1973630..1976227]	2598	2.5914	0.00229	336.975	130.036
Rv0092	[gene=ctpA] [locus_tag=Rv0092] [location=100583..102868]	2286	2.58759	0.003326	95.389	36.864
Rv0414c	[gene=thiE] [locus_tag=Rv0414c] [location=complement(500350..501018)]	669	2.58626	0.00229	52.589	20.334
Rv3028c	[gene=fixB] [locus_tag=Rv3028c] [location=complement(3387075..3388031)]	957	2.57384	0.01	343.664	133.522
Rv3103c	[locus_tag=Rv3103c] [location=complement(3471413..3471850)]	438	2.56496	0.00492	210.227	81.961
Rv0215c	[gene=fadE3] [locus_tag=Rv0215c] [location=complement(257783..258856)]	1074	2.5614	0.007592	34.748	13.566
Rv1672c	[locus_tag=Rv1672c] [location=complement(1896876..1898207)]	1332	2.55711	0.006888	100.965	39.484
Rv1640c	[gene=lysX] [locus_tag=Rv1640c] [location=complement(1848517..1852035)]	3519	2.55292	0.002694	67.489	26.436
Rv2636	[locus_tag=Rv2636] [location=2962713..2963390]	678	2.55055	0.003882	22.631	8.873
Rv1932	[gene=tpx] [locus_tag=Rv1932] [location=2183372..2183869]	498	2.54714	0.009952	248.341	97.498
Rv1137c	[locus_tag=Rv1137c] [location=complement(1265087..1265455)]	369	2.53791	0.006084	20.118	7.927
Rv1039c	[gene=PPE15] [locus_tag=Rv1039c] [location=complement(1161297..1162472)]	1176	2.53413	0.009693	25.653	10.123
Rv0926c	[locus_tag=Rv0926c] [location=complement(1032710..1033786)]	1077	2.52722	0.003109	38.444	15.212
Rv1399c	[gene=nlhH] [locus_tag=Rv1399c] [location=complement(1574850..1575809)]	960	2.51984	0.003882	100.514	39.889
Rv3449	[gene=mycP4] [locus_tag=Rv3449] [location=3869752..3871119]	1368	2.51639	0.005518	20.189	8.023
Rv2617c	[locus_tag=Rv2617c] [location=complement(2945847..2946287)]	441	2.51224	0.004084	106.911	42.556
Rv1231c	[locus_tag=Rv1231c] [location=complement(1374322..1374864)]	543	2.50866	0.002804	79.389	31.646
Rv1560	[gene=vapB11] [locus_tag=Rv1560] [location=1764755..1764973]	219	2.50636	0.007415	71.534	28.541
Rv1539	[gene=lspA] [locus_tag=Rv1539] [location=1742244..1742852]	609	2.49712	0.002104	332.811	133.278
Rv3029c	[gene=fixA] [locus_tag=Rv3029c] [location=complement(3388070..3388870)]	801	2.49661	0.007108	444.422	178.01
Rv1227c	[locus_tag=Rv1227c] [location=complement(1370292..1370825)]	534	2.4966	0.003535	129.079	51.702
Rv1919c	[locus_tag=Rv1919c] [location=complement(2171061..2171525)]	465	2.49305	0.006194	31.911	12.8
Rv0120c	[gene=fusA2] [locus_tag=Rv0120c] [location=complement(145627..147771)]	2145	2.48901	0.008951	79.494	31.938
Rv1075c	[locus_tag=Rv1075c] [location=complement(1199426..1200370)]	945	2.48859	0.00229	47.965	19.274
Rv3239c	[locus_tag=Rv3239c] [location=complement(3614457..3617603)]	3147	2.48487	0.001628	39.922	16.066
Rv0111	[locus_tag=Rv0111] [location=133950..136007]	2058	2.46869	0.004124	15.77	6.388
Rv0632c	[gene=echA3] [locus_tag=Rv0632c] [location=complement(728583..729278)]	696	2.46799	0.00229	328.225	132.993
Rv2621c	[locus_tag=Rv2621c] [location=complement(2947884..2948558)]	675	2.4645	0.008452	123.272	50.019
Rv3895c	[gene=eccB2] [locus_tag=Rv3895c] [location=complement(4380453..4381940)]	1488	2.46432	0.006497	65.403	26.54
Rv0975c	[gene=fadE13] [locus_tag=Rv0975c] [location=complement(1087348..1088496)]	1149	2.46396	0.00229	51.795	21.021
Rv2718c	[gene=nrdR] [locus_tag=Rv2718c] [location=complement(3030413..3030877)]	465	2.45866	0.005518	322.141	131.023
Rv2847c	[gene=cysG] [locus_tag=Rv2847c] [location=complement(3154654..3155871)]	1218	2.4503	0.007923	224.278	91.531
Rv0202c	[gene=mmpL11] [locus_tag=Rv0202c] [location=complement(238392..241292)]	2901	2.44217	0.01	228.983	93.762
Rv3401	[locus_tag=Rv3401] [location=3818042..3820402]	2361	2.44168	0.001577	175.972	72.07
Rv1831	[locus_tag=Rv1831] [location=2075571..2075828]	258	2.44003	0.003575	3458.54	1417.42
Rv0787	[locus_tag=Rv0787] [location=881459..882418]	960	2.43957	0.009282	448.351	183.783
Rv0522	[gene=gabP] [locus_tag=Rv0522] [location=613038..614342]	1305	2.43925	0.008686	65.989	27.053
Rv1823	[locus_tag=Rv1823] [location=2069702..2070625]	924	2.4381	0.008024	68.067	27.918
Rv2679	[gene=echA15] [locus_tag=Rv2679] [location=2995115..2995945]	831	2.43139	0.01	71.833	29.544
Rv0415	[gene=thiO] [locus_tag=Rv0415] [location=501148..502170]	1023	2.43116	0.007236	47.641	19.596
Rv1725c	[locus_tag=Rv1725c] [location=complement(1951041..1951751)]	711	2.42917	0.003426	51.926	21.376
Rv0020c	[gene=fhaA] [locus_tag=Rv0020c] [location=complement(23861..25444)]	1584	2.42099	0.003245	786.298	324.783
Rv2790c	[gene=ltp1] [locus_tag=Rv2790c] [location=complement(3098964..3100169)]	1206	2.41435	0.007767	284.852	117.983
Rv3827c	[locus_tag=Rv3827c] [location=complement(4301563..4302789)]	1227	2.41371	0.005822	111.588	46.231
Rv1862	[gene=adhA] [locus_tag=Rv1862] [location=2109544..2110584]	1041	2.41099	0.009037	169.143	70.155
Rv2090	[locus_tag=Rv2090] [location=2347373..2348554]	1182	2.40342	0.006933	88.458	36.805
Rv1467c	[gene=fadE15] [locus_tag=Rv1467c] [location=complement(1653673..1655502)]	1830	2.40185	0.01	70.23	29.24
Rv3896c	[locus_tag=Rv3896c] [location=complement(4381943..4382851)]	909	2.39889	0.003484	89.229	37.196
Rv3318	[gene=sdhA] [locus_tag=Rv3318] [location=3705000..3706772]	1773	2.39352	0.002104	42.741	17.857
Rv0042c	[locus_tag=Rv0042c] [location=complement(46581..47207)]	627	2.39066	0.008274	99.999	41.829
Rv2221c	[gene=glnE] [locus_tag=Rv2221c] [location=complement(2489369..2492353)]	2985	2.38902	0.005243	202.025	84.564
Rv3243c	[locus_tag=Rv3243c] [location=complement(3622249..3623091)]	843	2.38798	0.002986	84.735	35.484
Rv3715c	[gene=recR] [locus_tag=Rv3715c] [location=complement(4159889..4160500)]	612	2.38698	0.008157	157.383	65.934
Rv0671	[gene=lpqP] [locus_tag=Rv0671] [location=770582..771424]	843	2.3844	0.008081	191.61	80.36
Rv1330c	[gene=pncB1] [locus_tag=Rv1330c] [location=complement(1499213..1500559)]	1347	2.38241	0.005323	46.195	19.39
Rv3041c	[locus_tag=Rv3041c] [location=complement(3401055..3401918)]	864	2.38132	0.001245	97.165	40.803
Rv1999c	[locus_tag=Rv1999c] [location=complement(2243816..2245138)]	1323	2.37892	0.006084	12.368	5.199
Rv2468c	[locus_tag=Rv2468c] [location=complement(2771644..2772147)]	504	2.37729	0.008592	151.091	63.556
Rv1452c	[gene=PE_PGRS28] [locus_tag=Rv1452c] [location=complement(1636004..1638229)]	2226	2.37467	0.004626	8.043	3.387
Rv0952	[gene=sucD] [locus_tag=Rv0952] [location=1063140..1064051]	912	2.37343	0.006888	135.9	57.259
Rv1141c	[gene=echA11] [locus_tag=Rv1141c] [location=complement(1268203..1269009)]	807	2.37294	0.007415	79.655	33.568
Rv3813c	[locus_tag=Rv3813c] [location=complement(4278394..4279215)]	822	2.37202	0.005604	131.08	55.261
Rv1540	[locus_tag=Rv1540] [location=1742845..1743771]	927	2.37129	0.009926	397.445	167.607
Rv2539c	[gene=aroK] [locus_tag=Rv2539c] [location=complement(2862673..2863203)]	531	2.36926	0.009498	513.828	216.873
Rv1543	[locus_tag=Rv1543] [location=1745064..1746089]	1026	2.36742	0.006527	224.571	94.859
Rv0225	[locus_tag=Rv0225] [location=268663..269817]	1155	2.36203	0.009032	126.007	53.347
Rv2538c	[gene=aroB] [locus_tag=Rv2538c] [location=complement(2861588..2862676)]	1089	2.36185	0.005888	414.437	175.471
Rv0673	[gene=echA4] [locus_tag=Rv0673] [location=773123..774061]	939	2.36163	0.009836	119.803	50.729
Rv0515	[locus_tag=Rv0515] [location=606551..608062]	1512	2.36139	0.008419	611.855	259.108
Rv1230c	[locus_tag=Rv1230c] [location=complement(1372962..1374197)]	1236	2.36056	0.00392	82.209	34.826
Rv0558	[gene=menH] [locus_tag=Rv0558] [location=649689..650393]	705	2.35119	0.002409	280.478	119.292
Rv0923c	[locus_tag=Rv0923c] [location=complement(1029513..1030577)]	1065	2.35027	0.008282	147.355	62.697
Rv2608	[gene=PPE42] [locus_tag=Rv2608] [location=2935046..2936788]	1743	2.34546	0.005446	44.111	18.807
Rv1846c	[gene=blaI] [locus_tag=Rv1846c] [location=complement(2096183..2096599)]	417	2.3428	0.005166	1444.53	616.583
Rv2691	[gene=ceoB] [locus_tag=Rv2691] [location=3009344..3010027]	684	2.34103	0.006613	85.176	36.384
Rv1892	[locus_tag=Rv1892] [location=2140165..2140476]	312	2.33775	0.008062	128.845	55.115
Rv0551c	[gene=fadD8] [locus_tag=Rv0551c] [location=complement(641096..642811)]	1716	2.33685	0.003022	45.814	19.605
Rv3492c	[locus_tag=Rv3492c] [location=complement(3910465..3910947)]	483	2.33677	0.007918	78.284	33.501
Rv0388c	[gene=PPE9] [locus_tag=Rv0388c] [location=complement(467459..468001)]	543	2.33457	0.006407	11.939	5.114
Rv3774	[gene=echA21] [locus_tag=Rv3774] [location=4218849..4219673]	825	2.33438	0.009349	139.512	59.764
Rv1625c	[gene=cya] [locus_tag=Rv1625c] [location=complement(1826614..1827945)]	1332	2.33435	0.009132	416.369	178.366
Rv1329c	[gene=dinG] [locus_tag=Rv1329c] [location=complement(1497195..1499189)]	1995	2.32851	0.002419	61.135	26.255
Rv1853	[gene=ureD] [locus_tag=Rv1853] [location=2101022..2101648]	627	2.3275	0.005433	147.745	63.478
Rv1333	[locus_tag=Rv1333] [location=1501599..1502633]	1035	2.32725	0.00747	335.839	144.307
Rv2682c	[gene=dxs1] [locus_tag=Rv2682c] [location=complement(2998052..2999968)]	1917	2.32291	0.009796	408.382	175.806
Rv2112c	[gene=dop] [locus_tag=Rv2112c] [location=complement(2370905..2372569)]	1665	2.32174	0.001683	238.893	102.894
Rv1510	[locus_tag=Rv1510] [location=1701295..1702593]	1299	2.31746	0.005767	36.931	15.936
Rv2006	[gene=otsB1] [locus_tag=Rv2006] [location=2252002..2255985]	3984	2.31321	0.01	335.45	145.015
Rv2434c	[locus_tag=Rv2434c] [location=complement(2729115..2730560)]	1446	2.31171	0.009491	27.47	11.883
Rv0555	[gene=menD] [locus_tag=Rv0555] [location=646298..647962]	1665	2.31112	0.004448	213.409	92.34
Rv3772	[gene=hisC2] [locus_tag=Rv3772] [location=4217134..4218195]	1062	2.31035	0.004084	40.452	17.509
Rv0922	[locus_tag=Rv0922] [location=1027685..1029337]	1653	2.30839	0.007759	324.484	140.567
Rv2464c	[locus_tag=Rv2464c] [location=complement(2766859..2767665)]	807	2.30422	0.009268	124.027	53.826
Rv0819	[gene=mshD] [locus_tag=Rv0819] [location=911736..912683]	948	2.304	0.007108	314.701	136.589
Rv0398c	[locus_tag=Rv0398c] [location=complement(476679..477320)]	642	2.29788	0.002339	113.768	49.51
Rv0672	[gene=fadE8] [locus_tag=Rv0672] [location=771484..773112]	1629	2.29466	0.004414	101.151	44.081
Rv1438	[gene=tpi] [locus_tag=Rv1438] [location=1615564..1616349]	786	2.29356	0.005917	238.48	103.978
Rv0183	[locus_tag=Rv0183] [location=214088..214927]	840	2.29094	0.005386	95.931	41.874
Rv2326c	[locus_tag=Rv2326c] [location=complement(2597854..2599947)]	2094	2.29043	0.007397	669.678	292.381
Rv2241	[gene=aceE] [locus_tag=Rv2241] [location=2512539..2515244]	2706	2.28845	0.008999	196.724	85.964
Rv3758c	[gene=proV] [locus_tag=Rv3758c] [location=complement(4203287..4204417)]	1131	2.28437	0.005567	285.962	125.182
Rv1896c	[locus_tag=Rv1896c] [location=complement(2143535..2144446)]	912	2.28207	0.003245	56.18	24.618
Rv3305c	[gene=amiA1] [locus_tag=Rv3305c] [location=complement(3691639..3692808)]	1170	2.28062	0.007415	118.524	51.97
Rv0941c	[locus_tag=Rv0941c] [location=complement(1051544..1052317)]	774	2.28002	0.00992	62.493	27.409
Rv3488	[locus_tag=Rv3488] [location=3907667..3907990]	324	2.27612	0.004877	36.443	16.011
Rv3566c	[gene=nat] [locus_tag=Rv3566c] [location=complement(4007331..4008182)]	852	2.27426	0.009031	100.222	44.068
Rv3531c	[locus_tag=Rv3531c] [location=complement(3967817..3968944)]	1128	2.26389	0.006527	144.083	63.644
Rv0627	[gene=vapC5] [locus_tag=Rv0627] [location=718282..718689]	408	2.26251	0.003831	269.754	119.228
Rv0394c	[locus_tag=Rv0394c] [location=complement(474122..474841)]	720	2.26156	0.004368	107.148	47.378
Rv2260	[locus_tag=Rv2260] [location=2533330..2533965]	636	2.26055	0.005035	180.984	80.062
Rv3217c	[locus_tag=Rv3217c] [location=complement(3593804..3594235)]	432	2.25489	0.001184	230.783	102.348
Rv0064A	[gene=vapB1] [locus_tag=Rv0064A] [location=71589..71828]	240	2.25303	0.005917	54.609	24.238
Rv1863c	[locus_tag=Rv1863c] [location=complement(2110591..2111361)]	771	2.25188	0.004058	302.889	134.505
Rv1594	[gene=nadA] [locus_tag=Rv1594] [location=1794756..1795805]	1050	2.24984	0.006556	1670.4	742.453
Rv1614	[gene=lgt] [locus_tag=Rv1614] [location=1813171..1814577]	1407	2.24869	0.004775	201.386	89.557
Rv0230c	[gene=php] [locus_tag=Rv0230c] [location=complement(274983..275963)]	981	2.24297	0.01	35.107	15.652
Rv2888c	[gene=amiC] [locus_tag=Rv2888c] [location=complement(3196864..3198285)]	1422	2.2424	0.005518	453.85	202.395
Rv1338	[gene=murI] [locus_tag=Rv1338] [location=1505075..1505890]	816	2.23594	0.01	300.738	134.502
Rv2853	[gene=PE_PGRS48] [locus_tag=Rv2853] [location=3162268..3164115]	1848	2.23557	0.007053	32.95	14.739
Rv2357c	[gene=glyS] [locus_tag=Rv2357c] [location=complement(2639673..2641064)]	1392	2.23518	0.008999	28.959	12.956
Rv2142c	[gene=parE2] [locus_tag=Rv2142c] [location=complement(2402193..2402510)]	318	2.23247	0.01	73.888	33.097
Rv1826	[gene=gcvH] [locus_tag=Rv1826] [location=2071952..2072356]	405	2.2314	0.004864	514.929	230.765
Rv1245c	[locus_tag=Rv1245c] [location=complement(1387798..1388628)]	831	2.22711	0.005567	187.293	84.097
Rv3551	[locus_tag=Rv3551] [location=3989896..3990774]	879	2.22327	0.002117	77.134	34.694
Rv2797c	[locus_tag=Rv2797c] [location=complement(3105619..3107307)]	1689	2.22283	0.006606	24.4	10.977
Rv1589	[gene=bioB] [locus_tag=Rv1589] [location=1790284..1791333]	1050	2.21426	0.002419	148.258	66.956
Rv0210	[locus_tag=Rv0210] [location=250120..251598]	1479	2.21422	0.004084	36.497	16.483
Rv3757c	[gene=proW] [locus_tag=Rv3757c] [location=complement(4202610..4203299)]	690	2.2024	0.004058	292.6	132.855
Rv0296c	[locus_tag=Rv0296c] [location=complement(359758..361155)]	1398	2.19956	0.005446	39.326	17.879
Rv0201c	[locus_tag=Rv0201c] [location=complement(237892..238395)]	504	2.19845	0.007108	338.908	154.158
Rv1077	[gene=cbs] [locus_tag=Rv1077] [location=1201717..1203111]	1395	2.19573	0.003704	205.83	93.741
Rv1648	[locus_tag=Rv1648] [location=1857731..1858537]	807	2.1935	0.009134	37.987	17.318
Rv2914c	[gene=pknI] [locus_tag=Rv2914c] [location=complement(3221767..3223524)]	1758	2.18461	0.006933	37.466	17.15
Rv2587c	[gene=secD] [locus_tag=Rv2587c] [location=complement(2914015..2915736)]	1722	2.18198	0.00233	515.746	236.366
Rv1410c	[locus_tag=Rv1410c] [location=complement(1586210..1587766)]	1557	2.18128	0.006035	897.616	411.508
Rv3889c	[gene=espG2] [locus_tag=Rv3889c] [location=complement(4372800..4373630)]	831	2.17833	0.003704	78.823	36.185
Rv3450c	[gene=eccB4] [locus_tag=Rv3450c] [location=complement(3871084..3872496)]	1413	2.16589	0.008069	24.728	11.417
Rv3094c	[locus_tag=Rv3094c] [location=complement(3462761..3463891)]	1131	2.16337	0.007782	86.351	39.915
Rv0133	[locus_tag=Rv0133] [location=160869..161474]	606	2.16335	0.002104	203.71	94.164
Rv2125	[locus_tag=Rv2125] [location=2386293..2387171]	879	2.15543	0.008079	447.697	207.707
Rv1611	[gene=trpC] [locus_tag=Rv1611] [location=1810240..1811058]	819	2.15487	0.004149	342.564	158.972
Rv1275	[gene=lprC] [locus_tag=Rv1275] [location=1424751..1425293]	543	2.15443	0.009762	131.888	61.217
Rv0992c	[locus_tag=Rv0992c] [location=complement(1108578..1109171)]	594	2.15152	0.004437	62.975	29.27
Rv1204c	[locus_tag=Rv1204c] [location=complement(1346936..1348624)]	1689	2.15025	0.01	26.547	12.346
Rv1322A	[locus_tag=Rv1322A] [location=complement(1485313..1485771)]	459	2.14716	0.009767	1688.7	786.48
Rv0019c	[gene=fhaB] [locus_tag=Rv0019c] [location=complement(23270..23737)]	468	2.1455	0.01	622.448	290.118
Rv1647	[locus_tag=Rv1647] [location=1856774..1857724]	951	2.14523	0.003947	74.744	34.842
Rv2339	[gene=mmpL9] [locus_tag=Rv2339] [location=2614693..2617581]	2889	2.1385	0.009084	40.007	18.708
Rv0777	[gene=purB] [locus_tag=Rv0777] [location=870008..871426]	1419	2.13166	0.006084	161.539	75.781
Rv3025c	[gene=iscS] [locus_tag=Rv3025c] [location=complement(3383885..3385066)]	1182	2.1224	0.008033	294.595	138.803
Rv2533c	[gene=nusB] [locus_tag=Rv2533c] [location=complement(2858254..2858724)]	471	2.11735	0.007309	287.18	135.632
Rv3573c	[gene=fadE34] [locus_tag=Rv3573c] [location=complement(4014077..4016212)]	2136	2.11425	0.008879	21.208	10.031
Rv2224c	[gene=caeA] [locus_tag=Rv2224c] [location=complement(2495461..2497023)]	1563	2.11015	0.008564	225.862	107.036
Rv0585c	[locus_tag=Rv0585c] [location=complement(681885..684272)]	2388	2.10974	0.008951	31.184	14.781
Rv3438	[locus_tag=Rv3438] [location=3857397..3858239]	843	2.10668	0.004864	76.736	36.425
Rv3709c	[gene=ask] [locus_tag=Rv3709c] [location=complement(4152218..4153483)]	1266	2.09953	0.007398	514.191	244.908
Rv0951	[gene=sucC] [locus_tag=Rv0951] [location=1061964..1063127]	1164	2.09424	0.006888	167.129	79.804
Rv0164	[gene=TB18.5] [locus_tag=Rv0164] [location=193626..194111]	486	2.09137	0.006009	217.526	104.011
Rv3024c	[gene=trmU] [locus_tag=Rv3024c] [location=complement(3382785..3383888)]	1104	2.08891	0.0042	175.533	84.031
Rv3032	[locus_tag=Rv3032] [location=3391534..3392778]	1245	2.08098	0.009917	45.898	22.056
Rv1011	[gene=ispE] [locus_tag=Rv1011] [location=1130191..1131111]	921	2.07824	0.004007	52.012	25.027
Rv3674c	[gene=nth] [locus_tag=Rv3674c] [location=complement(4115157..4115894)]	738	2.07792	0.009349	223.611	107.613
Rv0594	[gene=mce2F] [locus_tag=Rv0594] [location=693237..694787]	1551	2.07676	0.006054	37.145	17.886
Rv1484	[gene=inhA] [locus_tag=Rv1484] [location=1674202..1675011]	810	2.07639	0.008087	299.233	144.112
Rv1474c	[locus_tag=Rv1474c] [location=complement(1662641..1663204)]	564	2.07506	0.002409	97.534	47.003
Rv0052	[locus_tag=Rv0052] [location=57410..57973]	564	2.07307	0.004775	105.66	50.968
Rv1822	[gene=pgsA2] [locus_tag=Rv1822] [location=2069080..2069709]	630	2.06908	0.009797	69.666	33.67
Rv0432	[gene=sodC] [locus_tag=Rv0432] [location=519600..520322]	723	2.06281	0.01	181.088	87.787
Rv1062	[locus_tag=Rv1062] [location=1184883..1185740]	858	2.05954	0.00229	84.886	41.216
Rv3069	[locus_tag=Rv3069] [location=3433692..3434090]	399	2.05632	0.009136	35.126	17.082
Rv3005c	[locus_tag=Rv3005c] [location=complement(3363693..3364532)]	840	2.05407	0.004525	263.155	128.114
Rv3623	[gene=lpqG] [locus_tag=Rv3623] [location=4062527..4063249]	723	2.04905	0.005888	55.685	27.176
Rv3144c	[gene=PPE52] [locus_tag=Rv3144c] [location=complement(3510088..3511317)]	1230	2.04726	0.006198	44.925	21.944
Rv0482	[gene=murB] [locus_tag=Rv0482] [location=570539..571648]	1110	2.04193	0.01	35.65	17.459
Rv3635	[locus_tag=Rv3635] [location=4073634..4075409]	1776	2.03845	0.006194	17.494	8.582
Rv2536	[locus_tag=Rv2536] [location=2860452..2861144]	693	2.03832	0.006868	249.288	122.301
Rv1464	[gene=csd] [locus_tag=Rv1464] [location=1651518..1652771]	1254	2.03371	0.008337	596.536	293.324
Rv0761c	[gene=adhB] [locus_tag=Rv0761c] [location=complement(854699..855826)]	1128	2.03298	0.006197	70.945	34.897
Rv2701c	[gene=suhB] [locus_tag=Rv2701c] [location=complement(3015863..3016735)]	873	2.02461	0.008629	35.623	17.595
Rv0769	[locus_tag=Rv0769] [location=862412..863158]	747	2.02456	0.005148	34.128	16.857
Rv0809	[gene=purM] [locus_tag=Rv0809] [location=903725..904819]	1095	2.00968	0.008999	374.986	186.59
Rv1057	[locus_tag=Rv1057] [location=1179396..1180577]	1182	0.484722	0.008069	443.787	915.55
Rv3485c	[locus_tag=Rv3485c] [location=complement(3904622..3905566)]	945	0.471102	0.007477	70.475	149.596
Rv2590	[gene=fadD9] [locus_tag=Rv2590] [location=2917871..2921377]	3507	0.468594	0.005128	674.328	1439.05
Rv2189c	[locus_tag=Rv2189c] [location=complement(2451247..2452020)]	774	0.453436	0.008583	38.212	84.272
Rv2123	[gene=PPE37] [locus_tag=Rv2123] [location=2381071..2382492]	1422	0.450479	0.007108	22.387	49.696
Rv1198	[gene=esxL] [locus_tag=Rv1198] [location=1341006..1341290]	285	0.433828	0.002154	47.04	108.43
Rv2054	[locus_tag=Rv2054] [location=2313125..2313838]	714	0.431325	0.003326	21.304	49.392
Rv3662c	[locus_tag=Rv3662c] [location=complement(4101265..4102035)]	771	0.416667	0.006263	71.948	172.675
Rv0282	[gene=eccA3] [locus_tag=Rv0282] [location=342130..344025]	1896	0.404104	0.005703	953.586	2359.75
Rv3603c	[locus_tag=Rv3603c] [location=complement(4045207..4046118)]	912	0.386069	0.00271	135.412	350.746
Rv3601c	[gene=panD] [locus_tag=Rv3601c] [location=complement(4043862..4044281)]	420	0.380391	0.00538	101.882	267.835
Rv2640c	[locus_tag=Rv2640c] [location=complement(2965478..2965837)]	360	0.356297	0.006645	42.172	118.362
Rv3230c	[locus_tag=Rv3230c] [location=complement(3607112..3608254)]	1143	0.349671	0.006407	314.162	898.45
Rv1348	[gene=irtA] [locus_tag=Rv1348] [location=1513047..1515626]	2580	0.341176	0.005483	41.604	121.943
Rv3228	[locus_tag=Rv3228] [location=3604726..3605718]	993	0.335595	0.002104	137.933	411.01
Rv2251	[locus_tag=Rv2251] [location=2525565..2526992]	1428	0.330509	0.003842	151.675	458.913
Rv1387	[gene=PPE20] [locus_tag=Rv1387] [location=1561769..1563388]	1620	0.328964	0.009809	398.645	1211.82
Rv2381c	[gene=mbtD] [locus_tag=Rv2381c] [location=complement(2667255..2670269)]	3015	0.324241	0.004147	41.357	127.55
Rv1534	[locus_tag=Rv1534] [location=1734734..1735411]	678	0.318573	0.00804	102.67	322.281
Rv2250A	[locus_tag=Rv2250A] [location=2525402..2525821]	420	0.300079	0.00233	36.137	120.425
Rv1349	[gene=irtB] [locus_tag=Rv1349] [location=1515623..1517362]	1740	0.29476	0.005582	30.999	105.167
Rv1196	[gene=PPE18] [locus_tag=Rv1196] [location=1339349..1340524]	1176	0.293245	0.007609	25.951	88.496
Rv1533	[locus_tag=Rv1533] [location=1733610..1734737]	1128	0.27388	0.004775	105.421	384.917
Rv3612c	[locus_tag=Rv3612c] [location=complement(4053518..4053847)]	330	0.27201	0.003599	78.931	290.177
Rv3741c	[locus_tag=Rv3741c] [location=complement(4192179..4192853)]	675	0.267804	0.008329	186.108	694.94
Rv2780	[gene=ald] [locus_tag=Rv2780] [location=3086820..3087935]	1116	0.265725	0.00799	128.775	484.617
Rv0106	[locus_tag=Rv0106] [location=124374..125570]	1197	0.19872	0.005888	17.758	89.362
Rv2628	[locus_tag=Rv2628] [location=2955058..2955420]	363	0.198544	0.005513	86.574	436.044
Rv2989	[locus_tag=Rv2989] [location=3346147..3346848]	702	0.195256	0.002104	95.586	489.543
Rv2990c	[locus_tag=Rv2990c] [location=complement(3346859..3347719)]	861	0.173451	0.008325	138.748	799.925
RVnc0035	[gene=MTS1082] [locus_tag=RVnc0035] [location=1547129..1547268]	140	0.163387	0.006868	9.765	59.766
Rv2988c	[gene=leuC] [locus_tag=Rv2988c] [location=complement(3344654..3346075)]	1422	0.151069	0.002419	99.165	656.42
RVnc0036a	[gene=MTS2823] [locus_tag=RVnc0036a] [location=4100669..4100968]	300	0.143618	0.003431	123056	856825
Rv2987c	[gene=leuD] [locus_tag=Rv2987c] [location=complement(3344033..3344629)]	597	0.141083	0.0042	51.33	363.828
Rv2056c	[gene=rpsN2] [locus_tag=Rv2056c] [location=complement(2314354..2314659)]	306	0.140007	0.003961	9.052	64.654
Rv0280	[gene=PPE3] [locus_tag=Rv0280] [location=339364..340974]	1611	0.0923858	0.0088	66.657	721.507
RVnc0036	[gene=MTS1338] [locus_tag=RVnc0036] [location=1960667..1960783]	117	0.0497849	0.002409	13833.1	277857
